# Supplementary material
Source: PubMed Central journal article supplement (PMC6124650)
Supplement: NIHMS77016-supplement-S1_Table.pdf [file NIHMS77016-supplement-S1_Table.pdf]

**S1 Table. Six candidate SNPs in the *FADS* region**

| Chromosome | BP*      | SNV        | Allele <sup>†</sup> | DAF     |      |
|------------|----------|------------|---------------------|---------|------|
|            |          |            |                     | GLACIER | GI   |
| 11         | 61353788 | rs174570   | C/T                 | 0.15    | 0.99 |
| 11         | 61380990 | rs174602   | C/T                 | 0.81    | 0.01 |
| 11         | 61384536 | rs74771917 | C/T                 | 0.04    | 0.98 |
| 11         | 61388086 | rs3168072  | A/T                 | 0.03    | 0.98 |
| 11         | 61388886 | rs12577276 | A/G                 | 0.03    | 0.98 |
| 11         | 61398293 | rs7115739  | G/T                 | 0.03    | 0.98 |

BP – basepair position; MAF - minor allele frequency; SNP - single nucleotide polymorphism; DAF – derived allele frequency; GI – Greenlandic Inuit.

\*build 36 (24)

† Alleles are coded as ancestral/derived states
