# Supplementary material
Source: PubMed Central journal article supplement (PMC6124650)
Supplement: NIHMS77016-supplement-S2_Table.pdf [file NIHMS77016-supplement-S2_Table.pdf]

**S2 Table. SNP × dietary fat interactions in relation to eight cardiometabolic traits (N=5,160)**

| SNP        | Dietary fat | Phenotype                  | $\beta$ | SE    | <i>P</i> | $\beta_{inv}$ | SE <sub>inv</sub> | <i>P</i> <sub>inv</sub> |
|------------|-------------|----------------------------|---------|-------|----------|---------------|-------------------|-------------------------|
| rs174570   | PUFA        | Weight (kg)                | -0.082  | 0.088 | 0.350    | -0.004        | 0.007             | 0.601                   |
| rs174602   | PUFA        | Weight (kg)                | -0.024  | 0.077 | 0.756    | -0.002        | 0.006             | 0.721                   |
| rs74771917 | PUFA        | Weight (kg)                | -0.164  | 0.133 | 0.217    | -0.011        | 0.010             | 0.283                   |
| rs3168072  | PUFA        | Weight (kg)                | -0.183  | 0.142 | 0.199    | -0.012        | 0.011             | 0.253                   |
| rs12577276 | PUFA        | Weight (kg)                | -0.162  | 0.142 | 0.253    | -0.011        | 0.011             | 0.306                   |
| rs7115739  | PUFA        | Weight (kg)                | -0.184  | 0.142 | 0.197    | -0.013        | 0.011             | 0.251                   |
| rs174570   | PUFA        | BMI (kg/m <sup>2</sup> )   | -0.021  | 0.031 | 0.497    | -0.004        | 0.008             | 0.666                   |
| rs174602   | PUFA        | BMI (kg/m <sup>2</sup> )   | -0.007  | 0.027 | 0.797    | -0.002        | 0.007             | 0.732                   |
| rs74771917 | PUFA        | BMI (kg/m <sup>2</sup> )   | -0.054  | 0.047 | 0.253    | -0.013        | 0.012             | 0.306                   |
| rs3168072  | PUFA        | BMI (kg/m <sup>2</sup> )   | -0.055  | 0.051 | 0.278    | -0.014        | 0.013             | 0.284                   |
| rs12577276 | PUFA        | BMI (kg/m <sup>2</sup> )   | -0.049  | 0.050 | 0.332    | -0.013        | 0.013             | 0.337                   |
| rs7115739  | PUFA        | BMI (kg/m <sup>2</sup> )   | -0.055  | 0.051 | 0.279    | -0.015        | 0.013             | 0.271                   |
| rs174570   | PUFA        | HDL-C (mmol/l)             | 0.010   | 0.005 | 0.052    | 0.020         | 0.011             | 0.057                   |
| rs174602   | PUFA        | HDL-C (mmol/l)             | 0.006   | 0.005 | 0.161    | 0.004         | 0.010             | 0.697                   |
| rs74771917 | PUFA        | HDL-C (mmol/l)             | 0.000   | 0.007 | 0.985    | -0.004        | 0.015             | 0.806                   |
| rs3168072  | PUFA        | HDL-C (mmol/l)             | 0.000   | 0.007 | 0.952    | -0.005        | 0.015             | 0.730                   |
| rs12577276 | PUFA        | HDL-C (mmol/l)             | -0.001  | 0.007 | 0.905    | -0.007        | 0.015             | 0.671                   |
| rs7115739  | PUFA        | HDL-C (mmol/l)             | 0.001   | 0.007 | 0.927    | 0.000         | 0.015             | 0.979                   |
| rs174570   | PUFA        | LDL-C (mmol/l)             | 0.001   | 0.012 | 0.910    | 0.002         | 0.011             | 0.883                   |
| rs174602   | PUFA        | LDL-C (mmol/l)             | 0.020   | 0.012 | 0.076    | 0.017         | 0.010             | 0.073                   |
| rs74771917 | PUFA        | LDL-C (mmol/l)             | 0.020   | 0.018 | 0.254    | 0.017         | 0.015             | 0.245                   |
| rs3168072  | PUFA        | LDL-C (mmol/l)             | 0.025   | 0.018 | 0.171    | 0.022         | 0.015             | 0.160                   |
| rs12577276 | PUFA        | LDL-C (mmol/l)             | 0.024   | 0.018 | 0.190    | 0.021         | 0.015             | 0.178                   |
| rs7115739  | PUFA        | LDL-C (mmol/l)             | 0.020   | 0.018 | 0.278    | 0.017         | 0.015             | 0.259                   |
| rs174570   | PUFA        | Total cholesterol (mmol/l) | -0.003  | 0.010 | 0.732    | -0.003        | 0.008             | 0.695                   |
| rs174602   | PUFA        | Total cholesterol (mmol/l) | 0.023   | 0.009 | 0.007    | 0.019         | 0.007             | 0.005                   |
| rs74771917 | PUFA        | Total cholesterol (mmol/l) | 0.006   | 0.015 | 0.663    | 0.006         | 0.012             | 0.634                   |
| rs3168072  | PUFA        | Total cholesterol (mmol/l) | 0.011   | 0.016 | 0.496    | 0.009         | 0.013             | 0.460                   |
| rs12577276 | PUFA        | Total cholesterol (mmol/l) | 0.014   | 0.016 | 0.367    | 0.012         | 0.013             | 0.328                   |
| rs7115739  | PUFA        | Total cholesterol (mmol/l) | 0.010   | 0.016 | 0.530    | 0.009         | 0.013             | 0.484                   |
| rs174570   | PUFA        | Triglycerides (mmol/l)     | 0.001   | 0.007 | 0.882    | -0.005        | 0.009             | 0.591                   |
| rs174602   | PUFA        | Triglycerides (mmol/l)     | 0.010   | 0.006 | 0.089    | 0.010         | 0.008             | 0.199                   |
| rs74771917 | PUFA        | Triglycerides (mmol/l)     | 0.011   | 0.010 | 0.259    | 0.018         | 0.013             | 0.165                   |
| rs3168072  | PUFA        | Triglycerides (mmol/l)     | 0.014   | 0.011 | 0.203    | 0.021         | 0.014             | 0.132                   |
| rs12577276 | PUFA        | Triglycerides (mmol/l)     | 0.014   | 0.011 | 0.174    | 0.022         | 0.014             | 0.114                   |
| rs7115739  | PUFA        | Triglycerides (mmol/l)     | 0.013   | 0.011 | 0.223    | 0.020         | 0.014             | 0.154                   |
| rs174570   | PUFA        | Fasting glucose (mmol/l)   | -0.013  | 0.006 | 0.015    | -0.018        | 0.008             | 0.031                   |
| rs174602   | PUFA        | Fasting glucose (mmol/l)   | -0.001  | 0.005 | 0.782    | -0.001        | 0.007             | 0.939                   |
| rs74771917 | PUFA        | Fasting glucose (mmol/l)   | -0.005  | 0.008 | 0.513    | -0.007        | 0.013             | 0.564                   |
| rs3168072  | PUFA        | Fasting glucose (mmol/l)   | -0.007  | 0.009 | 0.440    | -0.009        | 0.013             | 0.488                   |
| rs12577276 | PUFA        | Fasting glucose (mmol/l)   | -0.007  | 0.009 | 0.418    | -0.009        | 0.013             | 0.483                   |
| rs7115739  | PUFA        | Fasting glucose (mmol/l)   | -0.007  | 0.009 | 0.422    | -0.010        | 0.013             | 0.466                   |
| rs174570   | PUFA        | 2-h glucose (mmol/l)       | -0.002  | 0.012 | 0.877    | 0.002         | 0.008             | 0.846                   |
| rs174602   | PUFA        | 2-h glucose (mmol/l)       | -0.003  | 0.011 | 0.802    | -0.001        | 0.007             | 0.885                   |
| rs74771917 | PUFA        | 2-h glucose (mmol/l)       | -0.023  | 0.018 | 0.210    | -0.014        | 0.012             | 0.247                   |
| rs3168072  | PUFA        | 2-h glucose (mmol/l)       | -0.006  | 0.020 | 0.753    | -0.002        | 0.013             | 0.884                   |
| rs12577276 | PUFA        | 2-h glucose (mmol/l)       | -0.011  | 0.020 | 0.581    | -0.005        | 0.013             | 0.679                   |
| rs7115739  | PUFA        | 2-h glucose (mmol/l)       | -0.008  | 0.020 | 0.668    | -0.004        | 0.013             | 0.782                   |
| rs174570   | n-3 PUFA    | Weight (kg)                | -0.181  | 0.588 | 0.758    | 0.001         | 0.045             | 0.985                   |

|            |          |                            |        |       |       |        |       |       |
|------------|----------|----------------------------|--------|-------|-------|--------|-------|-------|
| rs174602   | n-3 PUFA | Weight (kg)                | 0.198  | 0.525 | 0.706 | 0.011  | 0.040 | 0.787 |
| rs74771917 | n-3 PUFA | Weight (kg)                | -1.163 | 0.950 | 0.221 | -0.079 | 0.073 | 0.277 |
| rs3168072  | n-3 PUFA | Weight (kg)                | -1.265 | 1.032 | 0.220 | -0.088 | 0.079 | 0.263 |
| rs12577276 | n-3 PUFA | Weight (kg)                | -1.096 | 1.017 | 0.281 | -0.078 | 0.078 | 0.317 |
| rs7115739  | n-3 PUFA | Weight (kg)                | -1.234 | 1.024 | 0.228 | -0.086 | 0.078 | 0.271 |
| rs174570   | n-3 PUFA | BMI (kg/m <sup>2</sup> )   | -0.014 | 0.209 | 0.945 | 0.006  | 0.055 | 0.916 |
| rs174602   | n-3 PUFA | BMI (kg/m <sup>2</sup> )   | 0.067  | 0.187 | 0.718 | 0.016  | 0.049 | 0.751 |
| rs74771917 | n-3 PUFA | BMI (kg/m <sup>2</sup> )   | -0.375 | 0.338 | 0.268 | -0.088 | 0.089 | 0.326 |
| rs3168072  | n-3 PUFA | BMI (kg/m <sup>2</sup> )   | -0.380 | 0.367 | 0.301 | -0.095 | 0.097 | 0.327 |
| rs12577276 | n-3 PUFA | BMI (kg/m <sup>2</sup> )   | -0.335 | 0.362 | 0.355 | -0.084 | 0.095 | 0.376 |
| rs7115739  | n-3 PUFA | BMI (kg/m <sup>2</sup> )   | -0.370 | 0.364 | 0.310 | -0.095 | 0.096 | 0.322 |
| rs174570   | n-3 PUFA | HDL-C (mmol/l)             | 0.068  | 0.034 | 0.046 | 0.114  | 0.072 | 0.113 |
| rs174602   | n-3 PUFA | HDL-C (mmol/l)             | 0.046  | 0.032 | 0.143 | 0.023  | 0.066 | 0.726 |
| rs74771917 | n-3 PUFA | HDL-C (mmol/l)             | 0.023  | 0.053 | 0.663 | 0.004  | 0.112 | 0.968 |
| rs3168072  | n-3 PUFA | HDL-C (mmol/l)             | 0.015  | 0.055 | 0.779 | -0.030 | 0.115 | 0.792 |
| rs12577276 | n-3 PUFA | HDL-C (mmol/l)             | 0.013  | 0.055 | 0.812 | -0.036 | 0.114 | 0.752 |
| rs7115739  | n-3 PUFA | HDL-C (mmol/l)             | 0.019  | 0.054 | 0.728 | 0.007  | 0.114 | 0.950 |
| rs174570   | n-3 PUFA | LDL-C (mmol/l)             | 0.011  | 0.085 | 0.902 | 0.011  | 0.072 | 0.883 |
| rs174602   | n-3 PUFA | LDL-C (mmol/l)             | 0.192  | 0.079 | 0.014 | 0.166  | 0.066 | 0.013 |
| rs74771917 | n-3 PUFA | LDL-C (mmol/l)             | 0.131  | 0.133 | 0.325 | 0.113  | 0.112 | 0.315 |
| rs3168072  | n-3 PUFA | LDL-C (mmol/l)             | 0.161  | 0.136 | 0.238 | 0.139  | 0.115 | 0.227 |
| rs12577276 | n-3 PUFA | LDL-C (mmol/l)             | 0.150  | 0.136 | 0.270 | 0.130  | 0.115 | 0.258 |
| rs7115739  | n-3 PUFA | LDL-C (mmol/l)             | 0.080  | 0.135 | 0.552 | 0.073  | 0.114 | 0.525 |
| rs174570   | n-3 PUFA | Total cholesterol (mmol/l) | -0.028 | 0.065 | 0.671 | -0.028 | 0.052 | 0.589 |
| rs174602   | n-3 PUFA | Total cholesterol (mmol/l) | 0.186  | 0.058 | 0.001 | 0.153  | 0.047 | 0.001 |
| rs74771917 | n-3 PUFA | Total cholesterol (mmol/l) | 0.017  | 0.105 | 0.871 | 0.014  | 0.084 | 0.871 |
| rs3168072  | n-3 PUFA | Total cholesterol (mmol/l) | 0.038  | 0.114 | 0.740 | 0.033  | 0.092 | 0.719 |
| rs12577276 | n-3 PUFA | Total cholesterol (mmol/l) | 0.072  | 0.113 | 0.523 | 0.063  | 0.090 | 0.484 |
| rs7115739  | n-3 PUFA | Total cholesterol (mmol/l) | 0.001  | 0.113 | 0.994 | 0.006  | 0.091 | 0.947 |
| rs174570   | n-3 PUFA | Triglycerides (mmol/l)     | 0.005  | 0.045 | 0.908 | -0.021 | 0.059 | 0.721 |
| rs174602   | n-3 PUFA | Triglycerides (mmol/l)     | 0.075  | 0.041 | 0.064 | 0.077  | 0.053 | 0.151 |
| rs74771917 | n-3 PUFA | Triglycerides (mmol/l)     | 0.057  | 0.073 | 0.432 | 0.111  | 0.095 | 0.243 |
| rs3168072  | n-3 PUFA | Triglycerides (mmol/l)     | 0.063  | 0.078 | 0.419 | 0.126  | 0.103 | 0.219 |
| rs12577276 | n-3 PUFA | Triglycerides (mmol/l)     | 0.073  | 0.077 | 0.343 | 0.137  | 0.101 | 0.175 |
| rs7115739  | n-3 PUFA | Triglycerides (mmol/l)     | 0.057  | 0.078 | 0.461 | 0.114  | 0.102 | 0.264 |
| rs174570   | n-3 PUFA | Fasting glucose (mmol/l)   | -0.052 | 0.037 | 0.158 | -0.073 | 0.056 | 0.187 |
| rs174602   | n-3 PUFA | Fasting glucose (mmol/l)   | -0.012 | 0.033 | 0.723 | -0.008 | 0.050 | 0.865 |
| rs74771917 | n-3 PUFA | Fasting glucose (mmol/l)   | -0.031 | 0.060 | 0.603 | -0.047 | 0.090 | 0.598 |
| rs3168072  | n-3 PUFA | Fasting glucose (mmol/l)   | -0.035 | 0.065 | 0.591 | -0.052 | 0.097 | 0.595 |
| rs12577276 | n-3 PUFA | Fasting glucose (mmol/l)   | -0.038 | 0.064 | 0.551 | -0.053 | 0.096 | 0.582 |
| rs7115739  | n-3 PUFA | Fasting glucose (mmol/l)   | -0.040 | 0.064 | 0.532 | -0.060 | 0.097 | 0.532 |
| rs174570   | n-3 PUFA | 2-h glucose (mmol/l)       | 0.045  | 0.082 | 0.583 | 0.048  | 0.054 | 0.375 |
| rs174602   | n-3 PUFA | 2-h glucose (mmol/l)       | 0.041  | 0.073 | 0.572 | 0.032  | 0.048 | 0.505 |
| rs74771917 | n-3 PUFA | 2-h glucose (mmol/l)       | -0.037 | 0.131 | 0.779 | -0.016 | 0.087 | 0.856 |
| rs3168072  | n-3 PUFA | 2-h glucose (mmol/l)       | 0.037  | 0.143 | 0.795 | 0.039  | 0.094 | 0.682 |
| rs12577276 | n-3 PUFA | 2-h glucose (mmol/l)       | -0.018 | 0.141 | 0.899 | -0.003 | 0.093 | 0.978 |
| rs7115739  | n-3 PUFA | 2-h glucose (mmol/l)       | -0.018 | 0.141 | 0.901 | -0.003 | 0.093 | 0.978 |
| rs174570   | n-6 PUFA | Weight (kg)                | -0.130 | 0.107 | 0.224 | -0.007 | 0.008 | 0.418 |
| rs174602   | n-6 PUFA | Weight (kg)                | -0.013 | 0.095 | 0.889 | -0.001 | 0.007 | 0.868 |
| rs74771917 | n-6 PUFA | Weight (kg)                | -0.216 | 0.157 | 0.169 | -0.015 | 0.012 | 0.228 |
| rs3168072  | n-6 PUFA | Weight (kg)                | -0.221 | 0.165 | 0.180 | -0.015 | 0.013 | 0.234 |
| rs12577276 | n-6 PUFA | Weight (kg)                | -0.196 | 0.164 | 0.232 | -0.013 | 0.013 | 0.288 |
| rs7115739  | n-6 PUFA | Weight (kg)                | -0.228 | 0.165 | 0.168 | -0.016 | 0.013 | 0.210 |

|            |          |                            |        |       |       |        |       |       |
|------------|----------|----------------------------|--------|-------|-------|--------|-------|-------|
| rs174570   | n-6 PUFA | BMI (kg/m <sup>2</sup> )   | -0.036 | 0.038 | 0.344 | -0.007 | 0.010 | 0.485 |
| rs174602   | n-6 PUFA | BMI (kg/m <sup>2</sup> )   | -0.001 | 0.034 | 0.967 | -0.001 | 0.009 | 0.895 |
| rs74771917 | n-6 PUFA | BMI (kg/m <sup>2</sup> )   | -0.067 | 0.056 | 0.227 | -0.017 | 0.015 | 0.248 |
| rs3168072  | n-6 PUFA | BMI (kg/m <sup>2</sup> )   | -0.065 | 0.059 | 0.271 | -0.017 | 0.015 | 0.263 |
| rs12577276 | n-6 PUFA | BMI (kg/m <sup>2</sup> )   | -0.057 | 0.058 | 0.326 | -0.015 | 0.015 | 0.316 |
| rs7115739  | n-6 PUFA | BMI (kg/m <sup>2</sup> )   | -0.068 | 0.059 | 0.250 | -0.019 | 0.015 | 0.229 |
| rs174570   | n-6 PUFA | HDL-C (mmol/l)             | 0.008  | 0.006 | 0.211 | 0.017  | 0.013 | 0.186 |
| rs174602   | n-6 PUFA | HDL-C (mmol/l)             | 0.007  | 0.006 | 0.241 | 0.005  | 0.012 | 0.681 |
| rs74771917 | n-6 PUFA | HDL-C (mmol/l)             | 0.001  | 0.008 | 0.876 | 0.002  | 0.017 | 0.905 |
| rs3168072  | n-6 PUFA | HDL-C (mmol/l)             | 0.000  | 0.008 | 0.990 | -0.002 | 0.017 | 0.901 |
| rs12577276 | n-6 PUFA | HDL-C (mmol/l)             | -0.001 | 0.008 | 0.944 | -0.004 | 0.017 | 0.835 |
| rs7115739  | n-6 PUFA | HDL-C (mmol/l)             | 0.002  | 0.008 | 0.834 | 0.003  | 0.017 | 0.858 |
| rs174570   | n-6 PUFA | LDL-C (mmol/l)             | 0.006  | 0.015 | 0.711 | 0.005  | 0.013 | 0.701 |
| rs174602   | n-6 PUFA | LDL-C (mmol/l)             | 0.030  | 0.014 | 0.034 | 0.025  | 0.012 | 0.033 |
| rs74771917 | n-6 PUFA | LDL-C (mmol/l)             | 0.027  | 0.020 | 0.173 | 0.024  | 0.017 | 0.166 |
| rs3168072  | n-6 PUFA | LDL-C (mmol/l)             | 0.031  | 0.020 | 0.134 | 0.026  | 0.017 | 0.127 |
| rs12577276 | n-6 PUFA | LDL-C (mmol/l)             | 0.029  | 0.020 | 0.153 | 0.025  | 0.017 | 0.145 |
| rs7115739  | n-6 PUFA | LDL-C (mmol/l)             | 0.025  | 0.020 | 0.225 | 0.022  | 0.017 | 0.212 |
| rs174570   | n-6 PUFA | Total cholesterol (mmol/l) | -0.002 | 0.012 | 0.892 | -0.002 | 0.010 | 0.824 |
| rs174602   | n-6 PUFA | Total cholesterol (mmol/l) | 0.025  | 0.010 | 0.019 | 0.020  | 0.008 | 0.016 |
| rs74771917 | n-6 PUFA | Total cholesterol (mmol/l) | 0.012  | 0.017 | 0.482 | 0.010  | 0.014 | 0.472 |
| rs3168072  | n-6 PUFA | Total cholesterol (mmol/l) | 0.016  | 0.018 | 0.375 | 0.014  | 0.015 | 0.357 |
| rs12577276 | n-6 PUFA | Total cholesterol (mmol/l) | 0.019  | 0.018 | 0.296 | 0.016  | 0.015 | 0.273 |
| rs7115739  | n-6 PUFA | Total cholesterol (mmol/l) | 0.014  | 0.018 | 0.429 | 0.012  | 0.015 | 0.398 |
| rs174570   | n-6 PUFA | Triglycerides (mmol/l)     | 0.003  | 0.008 | 0.737 | -0.005 | 0.011 | 0.625 |
| rs174602   | n-6 PUFA | Triglycerides (mmol/l)     | 0.014  | 0.007 | 0.053 | 0.014  | 0.010 | 0.133 |
| rs74771917 | n-6 PUFA | Triglycerides (mmol/l)     | 0.013  | 0.012 | 0.252 | 0.020  | 0.015 | 0.182 |
| rs3168072  | n-6 PUFA | Triglycerides (mmol/l)     | 0.015  | 0.012 | 0.226 | 0.022  | 0.016 | 0.164 |
| rs12577276 | n-6 PUFA | Triglycerides (mmol/l)     | 0.016  | 0.012 | 0.198 | 0.024  | 0.016 | 0.139 |
| rs7115739  | n-6 PUFA | Triglycerides (mmol/l)     | 0.015  | 0.012 | 0.223 | 0.022  | 0.016 | 0.171 |
| rs174570   | n-6 PUFA | Fasting glucose (mmol/l)   | -0.019 | 0.007 | 0.005 | -0.026 | 0.010 | 0.009 |
| rs174602   | n-6 PUFA | Fasting glucose (mmol/l)   | -0.003 | 0.006 | 0.621 | -0.002 | 0.009 | 0.837 |
| rs74771917 | n-6 PUFA | Fasting glucose (mmol/l)   | -0.001 | 0.010 | 0.884 | 0.000  | 0.015 | 0.980 |
| rs3168072  | n-6 PUFA | Fasting glucose (mmol/l)   | -0.005 | 0.010 | 0.660 | -0.004 | 0.016 | 0.777 |
| rs12577276 | n-6 PUFA | Fasting glucose (mmol/l)   | -0.004 | 0.010 | 0.666 | -0.004 | 0.015 | 0.804 |
| rs7115739  | n-6 PUFA | Fasting glucose (mmol/l)   | -0.007 | 0.010 | 0.512 | -0.008 | 0.016 | 0.616 |
| rs174570   | n-6 PUFA | 2-h glucose (mmol/l)       | -0.003 | 0.015 | 0.833 | 0.000  | 0.010 | 0.977 |
| rs174602   | n-6 PUFA | 2-h glucose (mmol/l)       | -0.001 | 0.013 | 0.939 | 0.000  | 0.009 | 0.995 |
| rs74771917 | n-6 PUFA | 2-h glucose (mmol/l)       | -0.025 | 0.022 | 0.257 | -0.015 | 0.014 | 0.310 |
| rs3168072  | n-6 PUFA | 2-h glucose (mmol/l)       | -0.012 | 0.023 | 0.605 | -0.005 | 0.015 | 0.729 |
| rs12577276 | n-6 PUFA | 2-h glucose (mmol/l)       | -0.017 | 0.023 | 0.456 | -0.009 | 0.015 | 0.543 |
| rs7115739  | n-6 PUFA | 2-h glucose (mmol/l)       | -0.012 | 0.023 | 0.609 | -0.006 | 0.015 | 0.713 |

β - beta effect estimate; BMI - body mass index; HDL-C - high-density lipoprotein cholesterol; LDL-C - low-density lipoprotein cholesterol; PUFA - polyunsaturated fat intake; SE - standard error; SNP - single nucleotide polymorphism.
