# Supplementary material
Source: PubMed Central journal article supplement (PMC6124650)
Supplement: NIHMS77016-supplement-S3_Table.pdf [file NIHMS77016-supplement-S3_Table.pdf]

**S3 Table. Variants in the FADS region covered by Cardio-Metabochip Array (N=442)**

| <i>Variant</i> | <i>Minor allele</i> | <i>Major allele</i> | <i>MAF</i> | <i>HWE P</i> | <i>N</i> | <i>Chromosome</i> | <i>Basepair*</i> |
|----------------|---------------------|---------------------|------------|--------------|----------|-------------------|------------------|
| chr11_61267612 | T                   | G                   | 0.001581   | 1            | 6008     | 11                | 61267612         |
| chr11_61281596 | A                   | G                   | 0.2069     | 0.3089       | 6062     | 11                | 61281596         |
| chr11_61291448 | A                   | C                   | 0.4988     | 0.07197      | 6053     | 11                | 61291448         |
| chr11_61295732 | A                   | T                   | 0.0009939  | 1            | 6037     | 11                | 61295732         |
| chr11_61305372 | A                   | G                   | 0.05059    | 0.03098      | 6058     | 11                | 61305372         |
| chr11_61316657 | A                   | G                   | 0.3106     | 0.2939       | 6060     | 11                | 61316657         |
| chr11_61330763 | T                   | G                   | 0.003219   | 1            | 6057     | 11                | 61330763         |
| chr11_61389196 | A                   | T                   | 0.00224    | 1            | 6027     | 11                | 61389196         |
| chr11_61426522 | A                   | G                   | 0.01723    | 0.03315      | 6064     | 11                | 61426522         |
| chr11_61482191 | T                   | C                   | 0.0008254  | 1            | 6058     | 11                | 61482191         |
| chr11:61262159 | A                   | G                   | 0.1509     | 0.2923       | 6047     | 11                | 61262159         |
| chr11:61262272 | T                   | G                   | 0.4574     | 0.06969      | 6045     | 11                | 61262272         |
| chr11:61262826 | T                   | C                   | 0.2037     | 0.3032       | 6054     | 11                | 61262826         |
| chr11:61263044 | T                   | C                   | 0.4606     | 0.1318       | 6000     | 11                | 61263044         |
| chr11:61263160 | T                   | C                   | 0.2044     | 0.2064       | 6061     | 11                | 61263160         |
| chr11:61264182 | A                   | G                   | 0.1553     | 1            | 6008     | 11                | 61264182         |
| chr11:61264650 | T                   | C                   | 0.2033     | 0.3613       | 6046     | 11                | 61264650         |
| chr11:61264955 | G                   | A                   | 0.3275     | 0.9068       | 6019     | 11                | 61264955         |
| chr11:61264985 | G                   | A                   | 0.01575    | 0.6595       | 5968     | 11                | 61264985         |
| chr11:61265098 | G                   | A                   | 0.3047     | 1            | 6054     | 11                | 61265098         |
| chr11:61265504 | T                   | C                   | 0.002649   | 1            | 6039     | 11                | 61265504         |
| chr11:61266165 | G                   | C                   | 0.3386     | 0.9087       | 6062     | 11                | 61266165         |
| chr11:61268074 | T                   | C                   | 0.1058     | 0.1538       | 6046     | 11                | 61268074         |
| chr11:61269136 | A                   | G                   | 0.1807     | 0.001165     | 5938     | 11                | 61269136         |
| chr11:61269976 | A                   | G                   | 0.2722     | 0.9741       | 6043     | 11                | 61269976         |
| chr11:61270143 | T                   | C                   | 0.002906   | 1            | 6023     | 11                | 61270143         |
| chr11:61270251 | C                   | G                   | 0.3367     | 0.6244       | 6043     | 11                | 61270251         |
| chr11:61270301 | G                   | A                   | 0.3389     | 1            | 6062     | 11                | 61270301         |
| chr11:61270661 | C                   | T                   | 0.3268     | 0.9071       | 6062     | 11                | 61270661         |
| chr11:61271246 | C                   | G                   | 0.3357     | 0.8852       | 6031     | 11                | 61271246         |
| chr11:61271333 | T                   | G                   | 0.009982   | 1            | 6061     | 11                | 61271333         |
| chr11:61271397 | G                   | A                   | 0.1499     | 0.6142       | 6059     | 11                | 61271397         |
| chr11:61271502 | A                   | G                   | 0.0008247  | 1            | 6063     | 11                | 61271502         |
| chr11:61272343 | C                   | T                   | 0.4869     | 0.258        | 6061     | 11                | 61272343         |
| chr11:61272446 | C                   | A                   | 0.1729     | 0.07243      | 6064     | 11                | 61272446         |
| chr11:61273052 | A                   | G                   | 0.1502     | 0.6149       | 6064     | 11                | 61273052         |
| chr11:61273486 | A                   | G                   | 0.1624     | 0.2776       | 6060     | 11                | 61273486         |
| chr11:61275562 | T                   | C                   | 0.3043     | 0.8556       | 6061     | 11                | 61275562         |
| chr11:61276118 | C                   | T                   | 0.3204     | 0.9765       | 6062     | 11                | 61276118         |
| chr11:61276391 | T                   | C                   | 0.04535    | 0.2966       | 6064     | 11                | 61276391         |
| chr11:61277244 | C                   | T                   | 0.3184     | 0.6997       | 6028     | 11                | 61277244         |
| chr11:61277894 | A                   | G                   | 0.4711     | 0.0634       | 6057     | 11                | 61277894         |
| chr11:61278022 | A                   | C                   | 0.4715     | 0.05988      | 6057     | 11                | 61278022         |
| chr11:61279535 | T                   | G                   | 0.006847   | 0.2462       | 6061     | 11                | 61279535         |
| chr11:61279877 | G                   | A                   | 0.4737     | 0.09914      | 6056     | 11                | 61279877         |
| chr11:61280311 | T                   | C                   | 0.2994     | 0.9756       | 6058     | 11                | 61280311         |
| chr11:61280942 | C                   | A                   | 0.4749     | 0.1047       | 6061     | 11                | 61280942         |
| chr11:61281083 | C                   | T                   | 0.1042     | 0.2704       | 6061     | 11                | 61281083         |

|                |   |   |          |         |      |    |          |
|----------------|---|---|----------|---------|------|----|----------|
| chr11:61282306 | A | G | 0.475    | 0.1643  | 6060 | 11 | 61282306 |
| chr11:61282397 | T | C | 0.001995 | 1       | 6014 | 11 | 61282397 |
| chr11:61282647 | T | C | 0.2232   | 0.2997  | 6062 | 11 | 61282647 |
| chr11:61283132 | G | A | 0.2257   | 0.1984  | 6060 | 11 | 61283132 |
| chr11:61283842 | G | A | 0.2255   | 0.2543  | 6062 | 11 | 61283842 |
| chr11:61284503 | T | C | 0.2291   | 0.1179  | 6063 | 11 | 61284503 |
| chr11:61284677 | T | C | 0.2251   | 0.2689  | 6053 | 11 | 61284677 |
| chr11:61284882 | A | C | 0.3711   | 0.1667  | 5999 | 11 | 61284882 |
| chr11:61285307 | G | T | 0.01843  | 0.2678  | 5778 | 11 | 61285307 |
| chr11:61285390 | T | C | 0.22     | 0.1443  | 6058 | 11 | 61285390 |
| chr11:61285470 | A | G | 0.006852 | 1       | 6057 | 11 | 61285470 |
| chr11:61285843 | G | T | 0.2047   | 0.1146  | 6064 | 11 | 61285843 |
| chr11:61286406 | C | A | 0.3389   | 0.07083 | 6054 | 11 | 61286406 |
| chr11:61287413 | C | G | 0.3333   | 0.4525  | 6061 | 11 | 61287413 |
| chr11:61288019 | G | A | 0.2009   | 0.6891  | 6064 | 11 | 61288019 |
| chr11:61288386 | G | A | 0.05377  | 0.3755  | 6063 | 11 | 61288386 |
| chr11:61288567 | G | A | 0.181    | 0.7289  | 6057 | 11 | 61288567 |
| chr11:61290373 | T | A | 0.4817   | 0.03663 | 6026 | 11 | 61290373 |
| chr11:61290484 | C | T | 0.482    | 0.05062 | 6061 | 11 | 61290484 |
| chr11:61290586 | T | C | 0.324    | 0.9299  | 6058 | 11 | 61290586 |
| chr11:61293006 | T | C | 0.4781   | 0.01246 | 6049 | 11 | 61293006 |
| chr11:61294105 | G | T | 0.1706   | 0.4667  | 6033 | 11 | 61294105 |
| chr11:61294977 | C | G | 0.3675   | 0.3475  | 6060 | 11 | 61294977 |
| chr11:61295859 | T | G | 0.002738 | 1       | 6027 | 11 | 61295859 |
| chr11:61296267 | A | G | 0.08957  | 0.3061  | 6062 | 11 | 61296267 |
| chr11:61299298 | A | G | 0.01019  | 0.1244  | 5936 | 11 | 61299298 |
| chr11:61300075 | C | T | 0.3485   | 0.07951 | 6063 | 11 | 61300075 |
| chr11:61300537 | C | T | 0.3471   | 0.1123  | 6055 | 11 | 61300537 |
| chr11:61303168 | G | A | 0.3467   | 0.08377 | 6063 | 11 | 61303168 |
| chr11:61303644 | A | G | 0.152    | 0.765   | 6062 | 11 | 61303644 |
| chr11:61304527 | T | C | 0.02441  | 0.2705  | 6064 | 11 | 61304527 |
| chr11:61304580 | A | G | 0.009155 | 1       | 6062 | 11 | 61304580 |
| chr11:61306007 | C | G | 0.005383 | 1       | 6038 | 11 | 61306007 |
| chr11:61312368 | C | A | 0.009865 | 1       | 5981 | 11 | 61312368 |
| chr11:61312615 | C | A | 0.1561   | 0.6611  | 6064 | 11 | 61312615 |
| chr11:61312650 | T | C | 0.01797  | 1       | 6064 | 11 | 61312650 |
| chr11:61313998 | A | G | 0.0189   | 1       | 6057 | 11 | 61313998 |
| chr11:61317864 | G | A | 0.02781  | 0.334   | 6059 | 11 | 61317864 |
| chr11:61320875 | T | G | 0.357    | 0.07317 | 6054 | 11 | 61320875 |
| chr11:61322152 | G | C | 0.001319 | 1       | 6064 | 11 | 61322152 |
| chr11:61326649 | C | T | 0.023    | 0.1383  | 6064 | 11 | 61326649 |
| chr11:61331734 | G | A | 0.3399   | 0.1027  | 6060 | 11 | 61331734 |
| chr11:61338026 | G | A | 0.2798   | 0.06878 | 6042 | 11 | 61338026 |
| chr11:61338340 | C | T | 0.3137   | 0.1893  | 6062 | 11 | 61338340 |
| chr11:61339103 | A | C | 0.02986  | 0.1789  | 6062 | 11 | 61339103 |
| chr11:61339284 | C | T | 0.3125   | 0.2204  | 6063 | 11 | 61339284 |
| chr11:61341716 | A | G | 0.02996  | 0.1794  | 6059 | 11 | 61341716 |
| chr11:61341720 | G | A | 0.3405   | 0.1158  | 6060 | 11 | 61341720 |
| chr11:61348938 | G | A | 0.3421   | 0.09791 | 6059 | 11 | 61348938 |
| chr11:61350392 | T | C | 0.3386   | 0.3138  | 6017 | 11 | 61350392 |
| chr11:61350740 | C | T | 0.007668 | 1       | 6064 | 11 | 61350740 |
| chr11:61351497 | C | T | 0.3397   | 0.1088  | 6060 | 11 | 61351497 |
| chr11:61351947 | A | C | 0.01029  | 1       | 6024 | 11 | 61351947 |

|                |   |   |          |         |      |    |          |
|----------------|---|---|----------|---------|------|----|----------|
| chr11:61352140 | T | C | 0.1554   | 0.6244  | 6053 | 11 | 61352140 |
| chr11:61353209 | T | C | 0.3419   | 0.1099  | 6059 | 11 | 61353209 |
| chr11:61355905 | T | G | 0.03003  | 0.1799  | 6061 | 11 | 61355905 |
| chr11:61355923 | A | G | 0.1553   | 0.6955  | 6062 | 11 | 61355923 |
| chr11:61356567 | T | C | 0.005774 | 1       | 6062 | 11 | 61356567 |
| chr11:61356903 | A | G | 0.2179   | 0.6238  | 6050 | 11 | 61356903 |
| chr11:61357954 | T | C | 0.1216   | 0.9043  | 6063 | 11 | 61357954 |
| chr11:61358448 | T | C | 0.1221   | 0.9522  | 6063 | 11 | 61358448 |
| chr11:61359148 | T | C | 0.03306  | 0.5438  | 6064 | 11 | 61359148 |
| chr11:61359934 | T | A | 0.1589   | 0.4139  | 6062 | 11 | 61359934 |
| chr11:61360900 | A | T | 0.03649  | 0.3582  | 6057 | 11 | 61360900 |
| chr11:61361358 | T | A | 0.1599   | 0.4438  | 6051 | 11 | 61361358 |
| chr11:61361543 | T | C | 0.1589   | 0.471   | 6062 | 11 | 61361543 |
| chr11:61362075 | A | T | 0.3422   | 0.08183 | 6063 | 11 | 61362075 |
| chr11:61362154 | G | T | 0.05822  | 1       | 6063 | 11 | 61362154 |
| chr11:61362189 | T | C | 0.1601   | 0.3396  | 6063 | 11 | 61362189 |
| chr11:61363218 | G | A | 0.342    | 0.03692 | 6043 | 11 | 61363218 |
| chr11:61363259 | A | G | 0.3428   | 0.09271 | 6064 | 11 | 61363259 |
| chr11:61363744 | G | A | 0.1606   | 0.3914  | 6063 | 11 | 61363744 |
| chr11:61364033 | A | G | 0.01947  | 1       | 6062 | 11 | 61364033 |
| chr11:61366024 | G | A | 0.02343  | 0.7748  | 6061 | 11 | 61366024 |
| chr11:61366284 | G | C | 0.02466  | 0.5885  | 6043 | 11 | 61366284 |
| chr11:61366326 | T | C | 0.3428   | 0.1237  | 6061 | 11 | 61366326 |
| chr11:61367609 | C | T | 0.05683  | 1       | 6062 | 11 | 61367609 |
| chr11:61368270 | A | G | 0.1656   | 0.3974  | 5923 | 11 | 61368270 |
| chr11:61368286 | C | T | 0.04073  | 0.3217  | 6064 | 11 | 61368286 |
| chr11:61369136 | G | C | 0.02731  | 0.3295  | 6059 | 11 | 61369136 |
| chr11:61369406 | T | C | 0.1527   | 0.321   | 6058 | 11 | 61369406 |
| chr11:61370417 | G | A | 0.05767  | 0.9058  | 6060 | 11 | 61370417 |
| chr11:61370599 | T | C | 0.05726  | 1       | 6060 | 11 | 61370599 |
| chr11:61372379 | G | C | 0.1494   | 0.1873  | 6016 | 11 | 61372379 |
| chr11:61372645 | G | A | 0.05726  | 1       | 6060 | 11 | 61372645 |
| chr11:61372898 | G | A | 0.05756  | 0.9058  | 6063 | 11 | 61372898 |
| chr11:61374252 | A | T | 0.2108   | 0.4402  | 6057 | 11 | 61374252 |
| chr11:61374592 | C | T | 0.05775  | 0.8133  | 6061 | 11 | 61374592 |
| chr11:61374745 | G | A | 0.1171   | 0.756   | 6061 | 11 | 61374745 |
| chr11:61375184 | G | A | 0.3571   | 0.1705  | 6062 | 11 | 61375184 |
| chr11:61375407 | C | T | 0.2198   | 0.3299  | 6051 | 11 | 61375407 |
| chr11:61375757 | C | T | 0.05912  | 0.8173  | 6064 | 11 | 61375757 |
| chr11:61375870 | A | G | 0.05769  | 0.8129  | 6058 | 11 | 61375870 |
| chr11:61377616 | C | G | 0.1694   | 0.3378  | 6060 | 11 | 61377616 |
| chr11:61377770 | A | G | 0.3077   | 0.1168  | 6057 | 11 | 61377770 |
| chr11:61378132 | C | G | 0.3596   | 0.19    | 6059 | 11 | 61378132 |
| chr11:61378187 | G | A | 0.07822  | 0.5921  | 6047 | 11 | 61378187 |
| chr11:61378199 | C | T | 0.006033 | 1       | 6050 | 11 | 61378199 |
| chr11:61379306 | A | G | 0.01387  | 0.6305  | 5913 | 11 | 61379306 |
| chr11:61379481 | A | C | 0.004646 | 1       | 6027 | 11 | 61379481 |
| chr11:61379716 | T | C | 0.3601   | 0.6144  | 6010 | 11 | 61379716 |
| chr11:61380757 | T | C | 0.3712   | 0.1846  | 6007 | 11 | 61380757 |
| chr11:61380860 | T | C | 0.001897 | 1       | 6062 | 11 | 61380860 |
| chr11:61380990 | C | T | 0.1885   | 0.3557  | 6060 | 11 | 61380990 |
| chr11:61381461 | G | C | 0.1425   | 0.7923  | 6033 | 11 | 61381461 |
| chr11:61383497 | T | G | 0.2599   | 0.7634  | 6040 | 11 | 61383497 |

|                |   |   |          |           |      |    |          |
|----------------|---|---|----------|-----------|------|----|----------|
| chr11:61383549 | G | T | 0.00124  | 2.791e-05 | 6048 | 11 | 61383549 |
| chr11:61384060 | G | A | 0.2608   | 0.5941    | 6064 | 11 | 61384060 |
| chr11:61384387 | C | T | 0.4247   | 0.06984   | 6063 | 11 | 61384387 |
| chr11:61384409 | G | A | 0.4235   | 0.1028    | 6056 | 11 | 61384409 |
| chr11:61384457 | C | T | 0.2606   | 0.6407    | 6060 | 11 | 61384457 |
| chr11:61384536 | T | C | 0.03776  | 0.5942    | 6064 | 11 | 61384536 |
| chr11:61385540 | A | T | 0.4231   | 0.0872    | 6060 | 11 | 61385540 |
| chr11:61385572 | C | T | 0.005937 | 1         | 6064 | 11 | 61385572 |
| chr11:61385698 | A | G | 0.423    | 0.08726   | 6064 | 11 | 61385698 |
| chr11:61385742 | G | A | 0.4231   | 0.08249   | 6063 | 11 | 61385742 |
| chr11:61385953 | T | C | 0.1364   | 0.9131    | 6061 | 11 | 61385953 |
| chr11:61386152 | T | C | 0.06234  | 0.8261    | 6064 | 11 | 61386152 |
| chr11:61386242 | A | G | 0.4189   | 0.09128   | 6061 | 11 | 61386242 |
| chr11:61386323 | G | A | 0.3923   | 0.08465   | 6061 | 11 | 61386323 |
| chr11:61386679 | A | C | 0.004649 | 1         | 6023 | 11 | 61386679 |
| chr11:61386680 | A | G | 0.1938   | 0.5649    | 6059 | 11 | 61386680 |
| chr11:61386960 | A | G | 0.001237 | 1         | 6064 | 11 | 61386960 |
| chr11:61387858 | T | C | 0.06135  | 0.2605    | 5982 | 11 | 61387858 |
| chr11:61387907 | G | A | 0.05961  | 0.3584    | 6048 | 11 | 61387907 |
| chr11:61387963 | A | G | 0.005632 | 1         | 6037 | 11 | 61387963 |
| chr11:61388030 | G | T | 0.05919  | 0.4166    | 5981 | 11 | 61388030 |
| chr11:61388086 | T | A | 0.03001  | 0.5021    | 6064 | 11 | 61388086 |
| chr11:61388190 | A | G | 0.05953  | 0.4914    | 6047 | 11 | 61388190 |
| chr11:61388886 | G | A | 0.03141  | 0.2006    | 6064 | 11 | 61388886 |
| chr11:61390228 | A | G | 0.001237 | 1         | 6064 | 11 | 61390228 |
| chr11:61390346 | T | C | 0.1267   | 0.6012    | 6063 | 11 | 61390346 |
| chr11:61391405 | G | T | 0.126    | 0.5994    | 6061 | 11 | 61391405 |
| chr11:61391776 | C | T | 0.1247   | 0.4415    | 5995 | 11 | 61391776 |
| chr11:61391870 | G | A | 0.4095   | 0.1364    | 6043 | 11 | 61391870 |
| chr11:61392593 | A | T | 0.1259   | 0.6829    | 6063 | 11 | 61392593 |
| chr11:61392702 | G | C | 0.127    | 0.4498    | 6023 | 11 | 61392702 |
| chr11:61392829 | G | C | 0.1258   | 0.5208    | 6062 | 11 | 61392829 |
| chr11:61392831 | C | T | 0.1241   | 0.7673    | 6036 | 11 | 61392831 |
| chr11:61393091 | G | T | 0.005295 | 1         | 6044 | 11 | 61393091 |
| chr11:61393633 | G | A | 0.4084   | 0.2111    | 6051 | 11 | 61393633 |
| chr11:61393925 | C | T | 0.1271   | 0.6026    | 6064 | 11 | 61393925 |
| chr11:61394042 | A | G | 0.1072   | 0.2824    | 6061 | 11 | 61394042 |
| chr11:61394163 | C | T | 0.1986   | 0.7776    | 6061 | 11 | 61394163 |
| chr11:61394810 | G | C | 0.1268   | 0.8616    | 6045 | 11 | 61394810 |
| chr11:61395529 | T | G | 0.1183   | 1         | 6037 | 11 | 61395529 |
| chr11:61395911 | G | A | 0.05952  | 0.3584    | 6057 | 11 | 61395911 |
| chr11:61395934 | C | T | 0.07574  | 0.02108   | 6047 | 11 | 61395934 |
| chr11:61396064 | T | C | 0.3267   | 0.05241   | 5980 | 11 | 61396064 |
| chr11:61396149 | G | A | 0.3583   | 0.2191    | 6063 | 11 | 61396149 |
| chr11:61396281 | C | T | 0.1256   | 0.9069    | 6064 | 11 | 61396281 |
| chr11:61396774 | G | A | 0.1244   | 0.8135    | 6062 | 11 | 61396774 |
| chr11:61396955 | G | A | 0.3613   | 0.156     | 6064 | 11 | 61396955 |
| chr11:61397097 | G | A | 0.1256   | 0.9069    | 6063 | 11 | 61397097 |
| chr11:61397972 | T | C | 0.2174   | 0.9398    | 6057 | 11 | 61397972 |
| chr11:61398293 | T | G | 0.03109  | 0.387     | 6063 | 11 | 61398293 |
| chr11:61398871 | T | C | 0.006766 | 1         | 6060 | 11 | 61398871 |
| chr11:61401336 | A | C | 0.006688 | 1         | 6056 | 11 | 61401336 |
| chr11:61403958 | A | G | 0.006769 | 1         | 6057 | 11 | 61403958 |

|                |   |   |          |           |      |    |          |
|----------------|---|---|----------|-----------|------|----|----------|
| chr11:61403963 | G | C | 0.2575   | 0.6364    | 5997 | 11 | 61403963 |
| chr11:61404003 | T | G | 0.2557   | 0.5876    | 6010 | 11 | 61404003 |
| chr11:61404689 | T | C | 0.08847  | 0.811     | 6064 | 11 | 61404689 |
| chr11:61405787 | T | C | 0.0866   | 0.6841    | 6051 | 11 | 61405787 |
| chr11:61407323 | G | A | 0.2565   | 0.9463    | 6062 | 11 | 61407323 |
| chr11:61407747 | C | T | 0.001319 | 1         | 6064 | 11 | 61407747 |
| chr11:61409740 | T | C | 0.08751  | 0.6873    | 6062 | 11 | 61409740 |
| chr11:61412693 | G | A | 0.3907   | 0.7057    | 6062 | 11 | 61412693 |
| chr11:61412758 | C | A | 0.2746   | 0.8467    | 6063 | 11 | 61412758 |
| chr11:61413686 | C | T | 0.3336   | 0.544     | 6056 | 11 | 61413686 |
| chr11:61413977 | A | C | 0.2746   | 0.8719    | 6062 | 11 | 61413977 |
| chr11:61414169 | C | T | 0.2745   | 0.7964    | 6060 | 11 | 61414169 |
| chr11:61414242 | A | G | 0.1637   | 0.453     | 6062 | 11 | 61414242 |
| chr11:61415205 | T | C | 0.1645   | 0.6398    | 6046 | 11 | 61415205 |
| chr11:61416104 | C | A | 0.006752 | 1         | 5998 | 11 | 61416104 |
| chr11:61417280 | A | G | 0.4049   | 0.729     | 6064 | 11 | 61417280 |
| chr11:61417689 | T | C | 0.0593   | 0.2984    | 6062 | 11 | 61417689 |
| chr11:61418265 | C | T | 0.001484 | 1         | 6063 | 11 | 61418265 |
| chr11:61419790 | A | G | 0.003134 | 1         | 6063 | 11 | 61419790 |
| chr11:61420811 | A | C | 0.001493 | 1         | 6030 | 11 | 61420811 |
| chr11:61421333 | A | G | 0.06544  | 0.6       | 6059 | 11 | 61421333 |
| chr11:61421568 | T | C | 0.4978   | 1         | 6027 | 11 | 61421568 |
| chr11:61421698 | A | G | 0.4939   | 0.7575    | 6040 | 11 | 61421698 |
| chr11:61421718 | A | G | 0.003328 | 1         | 6010 | 11 | 61421718 |
| chr11:61423700 | A | G | 0.001237 | 1         | 6064 | 11 | 61423700 |
| chr11:61424019 | T | C | 0.128    | 0.6041    | 6051 | 11 | 61424019 |
| chr11:61424455 | T | C | 0.06597  | 0.6008    | 6041 | 11 | 61424455 |
| chr11:61426613 | T | C | 0.3972   | 0.7264    | 6014 | 11 | 61426613 |
| chr11:61427222 | G | A | 0.0136   | 0.02499   | 6064 | 11 | 61427222 |
| chr11:61427321 | T | C | 0.04115  | 0.7446    | 6063 | 11 | 61427321 |
| chr11:61428532 | G | A | 0.4138   | 0.7912    | 6059 | 11 | 61428532 |
| chr11:61428723 | C | A | 0.0815   | 0.3036    | 6055 | 11 | 61428723 |
| chr11:61428811 | C | T | 0.2111   | 0.817     | 6062 | 11 | 61428811 |
| chr11:61428841 | C | T | 0.2124   | 0.9694    | 6064 | 11 | 61428841 |
| chr11:61429205 | T | G | 0.003299 | 1         | 6062 | 11 | 61429205 |
| chr11:61429221 | C | G | 0.4677   | 0.4861    | 6061 | 11 | 61429221 |
| chr11:61431397 | T | G | 0.005628 | 1         | 6041 | 11 | 61431397 |
| chr11:61432290 | C | T | 0.06685  | 0.1145    | 5849 | 11 | 61432290 |
| chr11:61432765 | G | A | 0.001237 | 1         | 6064 | 11 | 61432765 |
| chr11:61433081 | T | C | 0.03312  | 0.01486   | 6054 | 11 | 61433081 |
| chr11:61433473 | T | C | 0.07912  | 0.377     | 6054 | 11 | 61433473 |
| chr11:61436537 | T | C | 0.07952  | 0.4289    | 6061 | 11 | 61436537 |
| chr11:61436962 | T | G | 0.01116  | 1         | 6003 | 11 | 61436962 |
| chr11:61437446 | T | C | 0.199    | 0.2766    | 6062 | 11 | 61437446 |
| chr11:61440553 | A | G | 0.006522 | 1         | 6056 | 11 | 61440553 |
| chr11:61441126 | A | G | 0.3713   | 0.5636    | 6061 | 11 | 61441126 |
| chr11:61442367 | T | C | 0.06623  | 0.6777    | 6062 | 11 | 61442367 |
| chr11:61442526 | T | C | 0.1028   | 0.4859    | 6062 | 11 | 61442526 |
| chr11:61442650 | A | G | 0.0204   | 0.0008504 | 6055 | 11 | 61442650 |
| chr11:61442912 | A | G | 0.431    | 0.05597   | 6064 | 11 | 61442912 |
| chr11:61443706 | G | A | 0.02573  | 0.06306   | 6064 | 11 | 61443706 |
| chr11:61444030 | A | G | 0.02433  | 0.00932   | 6063 | 11 | 61444030 |
| chr11:61444502 | T | G | 0.4252   | 0.08739   | 6053 | 11 | 61444502 |

|                |   |   |          |           |      |    |          |
|----------------|---|---|----------|-----------|------|----|----------|
| chr11:61444591 | T | C | 0.01726  | 6.273e-05 | 5995 | 11 | 61444591 |
| chr11:61445281 | T | G | 0.1256   | 0.7701    | 6061 | 11 | 61445281 |
| chr11:61445498 | G | C | 0.09993  | 0.9431    | 6064 | 11 | 61445498 |
| chr11:61445851 | G | C | 0.00371  | 1         | 6064 | 11 | 61445851 |
| chr11:61446655 | T | G | 0.432    | 0.04671   | 6063 | 11 | 61446655 |
| chr11:61446759 | A | G | 0.3943   | 0.05983   | 6064 | 11 | 61446759 |
| chr11:61446981 | G | T | 0.02581  | 0.01913   | 6063 | 11 | 61446981 |
| chr11:61446996 | C | T | 0.1      | 0.9431    | 6057 | 11 | 61446996 |
| chr11:61447120 | G | C | 0.3249   | 0.05641   | 6029 | 11 | 61447120 |
| chr11:61447283 | A | G | 0.4301   | 0.04363   | 6062 | 11 | 61447283 |
| chr11:61447477 | A | G | 0.09921  | 0.8289    | 6043 | 11 | 61447477 |
| chr11:61447501 | C | T | 0.005624 | 1         | 6045 | 11 | 61447501 |
| chr11:61448595 | C | A | 0.4849   | 0.3412    | 6054 | 11 | 61448595 |
| chr11:61448917 | T | C | 0.056    | 0.2234    | 6063 | 11 | 61448917 |
| chr11:61450260 | T | C | 0.04281  | 1         | 6061 | 11 | 61450260 |
| chr11:61450925 | G | C | 0.02904  | 0.1024    | 6061 | 11 | 61450925 |
| chr11:61450970 | C | T | 0.4916   | 0.2272    | 6063 | 11 | 61450970 |
| chr11:61452000 | A | G | 0.001902 | 1         | 6046 | 11 | 61452000 |
| chr11:61452910 | G | A | 0.4842   | 0.3036    | 6059 | 11 | 61452910 |
| chr11:61453251 | G | A | 0.4843   | 0.2802    | 6062 | 11 | 61453251 |
| chr11:61453575 | T | A | 0.04174  | 0.1045    | 6062 | 11 | 61453575 |
| chr11:61454234 | G | A | 0.3775   | 0.6036    | 6063 | 11 | 61454234 |
| chr11:61454480 | A | G | 0.3772   | 0.566     | 6062 | 11 | 61454480 |
| chr11:61454548 | A | G | 0.01699  | 0.2527    | 6061 | 11 | 61454548 |
| chr11:61455064 | G | C | 0.3619   | 0.5781    | 6061 | 11 | 61455064 |
| chr11:61455631 | A | G | 0.4955   | 0.2082    | 6062 | 11 | 61455631 |
| chr11:61456403 | A | C | 0.1069   | 0.5015    | 6064 | 11 | 61456403 |
| chr11:61456595 | T | C | 0.05337  | 0.1598    | 6061 | 11 | 61456595 |
| chr11:61457395 | G | A | 0.3888   | 0.3582    | 6063 | 11 | 61457395 |
| chr11:61457460 | G | A | 0.4948   | 0.2272    | 6059 | 11 | 61457460 |
| chr11:61459043 | G | C | 0.05335  | 0.1596    | 6064 | 11 | 61459043 |
| chr11:61459179 | T | C | 0.4948   | 0.2477    | 6063 | 11 | 61459179 |
| chr11:61459483 | A | G | 0.1133   | 0.9485    | 5916 | 11 | 61459483 |
| chr11:61459487 | A | G | 0.1069   | 0.42      | 6063 | 11 | 61459487 |
| chr11:61460021 | A | G | 0.4956   | 0.2273    | 6063 | 11 | 61460021 |
| chr11:61460332 | C | T | 0.09865  | 1         | 6062 | 11 | 61460332 |
| chr11:61461783 | A | G | 0.4483   | 0.05139   | 6058 | 11 | 61461783 |
| chr11:61462587 | T | C | 0.4948   | 0.2584    | 6064 | 11 | 61462587 |
| chr11:61467114 | C | A | 0.4917   | 0.3547    | 6057 | 11 | 61467114 |
| chr11:61467123 | A | G | 0.05167  | 0.008033  | 6058 | 11 | 61467123 |
| chr11:61467398 | G | A | 0.4327   | 0.1102    | 6052 | 11 | 61467398 |
| chr11:61467448 | T | C | 0.04531  | 0.01643   | 6058 | 11 | 61467448 |
| chr11:61469222 | C | T | 0.01666  | 0.6845    | 6062 | 11 | 61469222 |
| chr11:61470071 | C | G | 0.04462  | 0.04791   | 6062 | 11 | 61470071 |
| chr11:61470166 | G | A | 0.1646   | 0.123     | 6060 | 11 | 61470166 |
| chr11:61472883 | G | T | 0.4805   | 0.6614    | 6044 | 11 | 61472883 |
| chr11:61472933 | A | G | 0.03472  | 0.2516    | 6062 | 11 | 61472933 |
| chr11:61473681 | G | C | 0.2065   | 0.0172    | 5905 | 11 | 61473681 |
| chr11:61473913 | C | G | 0.3826   | 1         | 6059 | 11 | 61473913 |
| chr11:61474183 | T | C | 0.1339   | 0.4067    | 6063 | 11 | 61474183 |
| chr11:61474612 | A | G | 0.382    | 0.8704    | 6064 | 11 | 61474612 |
| chr11:61474749 | A | G | 0.03174  | 0.004846  | 6064 | 11 | 61474749 |
| chr11:61475602 | A | G | 0.05821  | 0.1279    | 6064 | 11 | 61475602 |

|                |   |   |          |           |      |    |          |
|----------------|---|---|----------|-----------|------|----|----------|
| chr11:61475963 | C | T | 0.3827   | 1         | 6063 | 11 | 61475963 |
| chr11:61477114 | A | G | 0.3433   | 0.6691    | 6058 | 11 | 61477114 |
| chr11:61478160 | T | C | 0.1002   | 0.7755    | 6063 | 11 | 61478160 |
| chr11:61478215 | G | A | 0.3422   | 0.7103    | 6044 | 11 | 61478215 |
| chr11:61478294 | T | C | 0.0353   | 0.01188   | 6063 | 11 | 61478294 |
| chr11:61478788 | T | G | 0.09899  | 0.07172   | 6061 | 11 | 61478788 |
| chr11:61478841 | C | A | 0.1004   | 0.7762    | 6064 | 11 | 61478841 |
| chr11:61479221 | A | C | 0.09876  | 0.1493    | 6060 | 11 | 61479221 |
| chr11:61479414 | T | A | 0.09975  | 0.6682    | 6060 | 11 | 61479414 |
| chr11:61480132 | A | G | 0.09962  | 0.6674    | 6058 | 11 | 61480132 |
| chr11:61481090 | C | T | 0.1013   | 0.8878    | 6063 | 11 | 61481090 |
| chr11:61481159 | T | G | 0.4287   | 0.07049   | 6063 | 11 | 61481159 |
| chr11:61481363 | T | G | 0.1021   | 1         | 6031 | 11 | 61481363 |
| chr11:61481579 | C | G | 0.000993 | 1         | 6042 | 11 | 61481579 |
| chr11:61481750 | T | C | 0.1009   | 0.832     | 6064 | 11 | 61481750 |
| chr11:61482074 | G | A | 0.2921   | 0.5551    | 6061 | 11 | 61482074 |
| chr11:61482673 | T | G | 0.1362   | 0.01623   | 6063 | 11 | 61482673 |
| chr11:61482972 | G | A | 0.1366   | 0.01418   | 6062 | 11 | 61482972 |
| chr11:61483447 | G | T | 0.1364   | 0.01403   | 6061 | 11 | 61483447 |
| chr11:61484014 | T | C | 0.03027  | 0.3783    | 6063 | 11 | 61484014 |
| chr11:61484723 | T | C | 0.01929  | 0.0003803 | 6064 | 11 | 61484723 |
| chr11:61485069 | T | C | 0.002721 | 1         | 6063 | 11 | 61485069 |
| chr11:61485639 | C | T | 0.1373   | 0.01972   | 6064 | 11 | 61485639 |
| chr11:61486612 | A | G | 0.3675   | 0.699     | 6064 | 11 | 61486612 |
| chr11:61486759 | T | C | 0.1699   | 0.75      | 6064 | 11 | 61486759 |
| chr11:61486810 | C | T | 0.3074   | 0.1168    | 6062 | 11 | 61486810 |
| chr11:61487129 | C | T | 0.1711   | 0.6507    | 6062 | 11 | 61487129 |
| chr11:61487809 | A | C | 0.07704  | 1         | 6062 | 11 | 61487809 |
| chr11:61488303 | C | T | 0.03925  | 0.01543   | 6064 | 11 | 61488303 |
| chr11:61488553 | A | G | 0.05403  | 0.07686   | 6061 | 11 | 61488553 |
| chr11:61489925 | C | T | 0.02309  | 0.01501   | 6064 | 11 | 61489925 |
| chr11:61490604 | C | T | 0.004617 | 1         | 6064 | 11 | 61490604 |
| chr11:61491963 | T | C | 0.0035   | 1         | 6000 | 11 | 61491963 |
| chr11:61492987 | C | A | 0.05096  | 0.1089    | 6064 | 11 | 61492987 |
| chr11:61493820 | G | T | 0.3066   | 0.06108   | 6061 | 11 | 61493820 |
| chr11:61494145 | G | A | 0.07737  | 0.8573    | 6062 | 11 | 61494145 |
| chr11:61495121 | G | T | 0.3069   | 0.05334   | 6063 | 11 | 61495121 |
| chr11:61495718 | C | G | 0.2864   | 0.245     | 6063 | 11 | 61495718 |
| chr11:61496162 | C | A | 0.3967   | 0.334     | 6060 | 11 | 61496162 |
| chr11:61499312 | A | G | 0.07823  | 0.06041   | 6053 | 11 | 61499312 |
| chr11:61499314 | G | A | 0.01418  | 2.439e-05 | 6063 | 11 | 61499314 |
| chr11:61499542 | T | C | 0.3966   | 0.2952    | 6060 | 11 | 61499542 |
| chr11:61499854 | C | T | 0.07731  | 1         | 6060 | 11 | 61499854 |
| chr11:61501248 | G | A | 0.05007  | 0.4176    | 6062 | 11 | 61501248 |
| chr11:61502845 | G | T | 0.09391  | 0.4062    | 6064 | 11 | 61502845 |
| chr11:61502850 | G | T | 0.02152  | 0.2052    | 6064 | 11 | 61502850 |
| chr11:61502867 | C | A | 0.3028   | 0.05152   | 6062 | 11 | 61502867 |
| chr11:61503365 | G | A | 0.09413  | 0.4077    | 6061 | 11 | 61503365 |
| chr11:61503594 | T | C | 0.1747   | 0.5626    | 6062 | 11 | 61503594 |
| chr11:61504642 | A | G | 0.0508   | 0.1076    | 6063 | 11 | 61504642 |
| chr11:61504764 | A | G | 0.01443  | 0.6384    | 6062 | 11 | 61504764 |
| chr11:61505378 | G | C | 0.09416  | 0.4082    | 6064 | 11 | 61505378 |
| chr11:61506342 | C | T | 0.3433   | 0.1107    | 6064 | 11 | 61506342 |

|                |   |   |         |         |      |    |          |
|----------------|---|---|---------|---------|------|----|----------|
| chr11:61507399 | T | C | 0.09411 | 0.4076  | 6062 | 11 | 61507399 |
| chr11:61507724 | A | G | 0.09394 | 0.4965  | 6057 | 11 | 61507724 |
| rs1000778      | A | G | 0.2724  | 0.7213  | 6049 | 11 | 61411881 |
| rs102275       | C | T | 0.3439  | 0.1631  | 6062 | 11 | 61314379 |
| rs10792346     | T | G | 0.4096  | 0.6904  | 6059 | 11 | 61896645 |
| rs10897165     | A | G | 0.1575  | 0.3324  | 6049 | 11 | 61034461 |
| rs10897167     | G | A | 0.05084 | 0.689   | 6058 | 11 | 61048498 |
| rs10897213     | C | T | 0.4389  | 0.8347  | 6060 | 11 | 61584324 |
| rs10897267     | A | G | 0.4113  | 0.5596  | 6061 | 11 | 61913994 |
| rs11230749     | T | C | 0.21    | 0.6702  | 6062 | 11 | 61119554 |
| rs11603956     | T | C | 0.0458  | 0.7681  | 6059 | 11 | 61046805 |
| rs12274157     | C | A | 0.1527  | 0.4268  | 6050 | 11 | 61234223 |
| rs12281809     | G | A | 0.2281  | 0.4437  | 6064 | 11 | 61569518 |
| rs12418839     | G | A | 0.05145 | 0.1876  | 6064 | 11 | 61651467 |
| rs12787061     | C | G | 0.06212 | 0.659   | 6037 | 11 | 61013931 |
| rs149803       | G | C | 0.2748  | 0.1655  | 6054 | 11 | 61295596 |
| rs1535         | G | A | 0.3403  | 0.1295  | 6062 | 11 | 61354548 |
| rs1675133      | C | T | 0.4042  | 0.5753  | 6057 | 11 | 61653935 |
| rs17156426     | G | A | 0.05698 | 1       | 6064 | 11 | 61365899 |
| rs17185574     | C | T | 0.1748  | 0.6242  | 6059 | 11 | 61502270 |
| rs174450       | G | T | 0.4537  | 0.1864  | 6064 | 11 | 61398118 |
| rs174468       | A | G | 0.3987  | 0.7889  | 6064 | 11 | 61420267 |
| rs174476       | T | C | 0.4033  | 0.5929  | 6039 | 11 | 61430694 |
| rs174478       | G | T | 0.4034  | 0.8518  | 6058 | 11 | 61435152 |
| rs174479       | G | C | 0.125   | 0.7244  | 6057 | 11 | 61435330 |
| rs174532       | A | G | 0.301   | 0.464   | 6061 | 11 | 61305450 |
| rs174535       | C | T | 0.3419  | 0.1232  | 6060 | 11 | 61307932 |
| rs174537       | T | G | 0.3378  | 0.2752  | 6059 | 11 | 61309256 |
| rs174546       | T | C | 0.3401  | 0.1293  | 6062 | 11 | 61326406 |
| rs174547       | C | T | 0.3401  | 0.1224  | 6063 | 11 | 61327359 |
| rs174548       | G | C | 0.3138  | 0.161   | 6063 | 11 | 61327924 |
| rs174549       | A | G | 0.3122  | 0.1881  | 6061 | 11 | 61327958 |
| rs174550       | C | T | 0.34    | 0.1155  | 6063 | 11 | 61328054 |
| rs174555       | C | T | 0.3123  | 0.2318  | 6061 | 11 | 61336336 |
| rs174556       | T | C | 0.3118  | 0.1783  | 6064 | 11 | 61337211 |
| rs174570       | T | C | 0.1543  | 0.4603  | 6064 | 11 | 61353788 |
| rs174574       | A | C | 0.3411  | 0.2515  | 6019 | 11 | 61356918 |
| rs174575       | G | C | 0.2195  | 0.4311  | 6058 | 11 | 61358579 |
| rs174576       | A | C | 0.3419  | 0.07676 | 6062 | 11 | 61360086 |
| rs174577       | A | C | 0.3421  | 0.08688 | 6062 | 11 | 61361390 |
| rs174868       | C | T | 0.03267 | 0.4165  | 6061 | 11 | 61127859 |
| rs17707648     | A | G | 0.05219 | 0.2414  | 6064 | 11 | 61647388 |
| rs17762402     | A | G | 0.06985 | 0.7665  | 6063 | 11 | 61309777 |
| rs1794072      | C | T | 0.2089  | 0.4603  | 6059 | 11 | 61060379 |
| rs195157       | G | A | 0.1368  | 0.01659 | 6064 | 11 | 61484367 |
| rs198462       | A | G | 0.4743  | 0.08901 | 6055 | 11 | 61280695 |
| rs2072114      | G | A | 0.1803  | 0.5722  | 6055 | 11 | 61361791 |
| rs2453712      | T | C | 0.1106  | 0.794   | 6062 | 11 | 61169904 |
| rs2521561      | C | T | 0.436   | 0.05667 | 6063 | 11 | 61442565 |
| rs2521568      | C | G | 0.1057  | 0.5414  | 6063 | 11 | 61457509 |
| rs2521572      | T | G | 0.05179 | 0.7937  | 6063 | 11 | 61468051 |
| rs2526678      | A | G | 0.1331  | 0.4361  | 6060 | 11 | 61380369 |
| rs2736602      | C | A | 0.396   | 0.4203  | 6057 | 11 | 61462069 |



|           |   |   |         |         |      |    |          |
|-----------|---|---|---------|---------|------|----|----------|
| rs2845573 | G | A | 0.1213  | 0.9519  | 6053 | 11 | 61358484 |
| rs2851682 | G | A | 0.1316  | 0.7788  | 6063 | 11 | 61372588 |
| rs2924446 | C | T | 0.109   | 0.5085  | 6063 | 11 | 61017458 |
| rs3741259 | T | C | 0.104   | 0.08463 | 6054 | 11 | 61038926 |
| rs3815045 | A | G | 0.01715 | 0.032   | 6063 | 11 | 61426522 |
| rs3931642 | A | C | 0.2388  | 0.8045  | 6045 | 11 | 61219000 |
| rs4122113 | A | C | 0.03282 | 1       | 6064 | 11 | 61759685 |
| rs412334  | T | C | 0.1471  | 0.4132  | 6064 | 11 | 61316837 |
| rs482548  | T | C | 0.05764 | 0.4067  | 6063 | 11 | 61389758 |
| rs4963243 | A | G | 0.1498  | 0.6139  | 6060 | 11 | 61250903 |
| rs4963452 | C | T | 0.1869  | 0.8658  | 6061 | 11 | 61572379 |
| rs4963488 | C | T | 0.02919 | 1       | 6064 | 11 | 61795977 |
| rs498793  | T | C | 0.4133  | 0.3822  | 6064 | 11 | 61381281 |
| rs579383  | G | A | 0.481   | 0.03703 | 6050 | 11 | 61293159 |
| rs7104849 | G | A | 0.1328  | 0.6965  | 6064 | 11 | 61394620 |
| rs740006  | C | T | 0.1304  | 0.9098  | 6063 | 11 | 61314444 |
| rs751984  | C | T | 0.1694  | 0.2529  | 6043 | 11 | 61034822 |
| rs7935946 | T | C | 0.05755 | 0.9058  | 6064 | 11 | 61372118 |
| rs7942717 | G | A | 0.09716 | 0.2127  | 6062 | 11 | 61403864 |
| rs7943167 | T | C | 0.05131 | 1       | 6061 | 11 | 61044933 |
| rs882169  | T | C | 0.4854  | 0.2803  | 6061 | 11 | 61448706 |
| rs903778  | G | A | 0.4819  | 0.01173 | 6064 | 11 | 61192318 |
| rs953169  | G | A | 0.4039  | 0.8103  | 6062 | 11 | 61840118 |

\*build36

HWE - Hardy-Weinberg equilibrium; MAF - minor allele frequency; N - sample size, MAF - minor allele frequency; SNP - single nucleotide polymorphism
