# Supplementary material
Source: PubMed Central journal article supplement (PMC6124650)
Supplement: NIHMS77016-supplement-S4_Table.pdf [file NIHMS77016-supplement-S4_Table.pdf]

Supplemental Table 4. Chromatin-state annotation of 43 FADS variants.

| rsID*       | Haploblock | Chromosome | Basepair† | GM12878                | H1-hESC                | HepG2                  | HMEC                   | HSMC                   | HUVEC                  | K562                   | NHEK                   | NHLF                   | Basepair‡ |
|-------------|------------|------------|-----------|------------------------|------------------------|------------------------|------------------------|------------------------|------------------------|------------------------|------------------------|------------------------|-----------|
| rs174570†   | 8          | 11         | 61353788  | Name=4 Strong Enhancer | Name=2 Weak Promoter   | Name=2 Weak Promoter   | Name=2 Weak Promoter   | Name=6 Weak Enhancer   | Name=4 Strong Enhancer | Name=11 Weak Txn       | Name=1 Active Promoter | Name=1 Active Promoter | 61597212  |
| rs174599    | 12         | 11         | 61378132  | Name=10 Txn Elongation | Name=10 Txn Elongation | Name=10 Txn Elongation | Name=10 Txn Elongation | Name=11 Weak Txn       | Name=10 Txn Elongation | Name=7 Weak Enhancer   | Name=10 Txn Elongation | Name=10 Txn Elongation | 61621556  |
| rs73487492  | 12         | 11         | 61378187  | Name=10 Txn Elongation | Name=10 Txn Elongation | Name=10 Txn Elongation | Name=10 Txn Elongation | Name=11 Weak Txn       | Name=10 Txn Elongation | Name=7 Weak Enhancer   | Name=10 Txn Elongation | Name=10 Txn Elongation | 61621611  |
| rs182008711 | 12         | 11         | 61378199  | Name=10 Txn Elongation | Name=10 Txn Elongation | Name=10 Txn Elongation | Name=10 Txn Elongation | Name=11 Weak Txn       | Name=10 Txn Elongation | Name=7 Weak Enhancer   | Name=10 Txn Elongation | Name=10 Txn Elongation | 61621623  |
| rs11501631  | 12         | 11         | 61379306  | Name=10 Txn Elongation | Name=10 Txn Elongation | Name=10 Txn Elongation | Name=11 Weak Txn       | Name=11 Weak Txn       | Name=10 Txn Elongation | Name=11 Weak Txn       | Name=10 Txn Elongation | Name=10 Txn Elongation | 61622730  |
| rs556656    | 12         | 11         | 61379481  | Name=10 Txn Elongation | Name=10 Txn Elongation | Name=10 Txn Elongation | Name=11 Weak Txn       | Name=11 Weak Txn       | Name=10 Txn Elongation | Name=11 Weak Txn       | Name=10 Txn Elongation | Name=10 Txn Elongation | 61622905  |
| rs174601    | 12         | 11         | 61379716  | Name=10 Txn Elongation | Name=10 Txn Elongation | Name=10 Txn Elongation | Name=11 Weak Txn       | Name=11 Weak Txn       | Name=10 Txn Elongation | Name=11 Weak Txn       | Name=10 Txn Elongation | Name=10 Txn Elongation | 61623140  |
| rs174602†   | -          | 11         | 61380990  | Name=10 Txn Elongation | Name=10 Txn Elongation | Name=10 Txn Elongation | Name=11 Weak Txn       | Name=11 Weak Txn       | Name=10 Txn Elongation | Name=11 Weak Txn       | Name=10 Txn Elongation | Name=10 Txn Elongation | 61624414  |
| rs74771917† | 14         | 11         | 61384536  | Name=10 Txn Elongation | Name=10 Txn Elongation | Name=11 Weak Txn       | Name=7 Weak Enhancer   | Name=11 Weak Txn       | Name=10 Txn Elongation | Name=4 Strong Enhancer | Name=9 Txn Transition  | Name=10 Txn Elongation | 61627960  |
| rs3168072†  | 14         | 11         | 61388086  | Name=10 Txn Elongation | Name=10 Txn Elongation | Name=11 Weak Txn       | Name=11 Weak Txn       | Name=11 Weak Txn       | Name=10 Txn Elongation | Name=11 Weak Txn       | Name=10 Txn Elongation | Name=10 Txn Elongation | 61631510  |
| rs12577276† | 14         | 11         | 61388886  | Name=11 Weak Txn       | Name=10 Txn Elongation | Name=11 Weak Txn       | Name=11 Weak Txn       | Name=11 Weak Txn       | Name=10 Txn Elongation | Name=11 Weak Txn       | Name=10 Txn Elongation | Name=10 Txn Elongation | 61632310  |
| rs174450    | 16         | 11         | 61398118  | Name=13 Heterochrom/lo | Name=13 Heterochrom/lo | Name=13 Heterochrom/lo | Name=11 Weak Txn       | Name=9 Txn Transition  | Name=11 Weak Txn       | Name=8 Insulator       | Name=12 Repressed      | Name=11 Weak Txn       | 61641542  |
| rs7115739†  | 16         | 11         | 61398293  | Name=13 Heterochrom/lo | Name=13 Heterochrom/lo | Name=8 Insulator       | Name=10 Txn Elongation | Name=4 Strong Enhancer | Name=8 Insulator       | Name=8 Insulator       | Name=12 Repressed      | Name=11 Weak Txn       | 61641717  |
| rs12292968  | 16         | 11         | 61398871  | Name=13 Heterochrom/lo | Name=13 Heterochrom/lo | Name=13 Heterochrom/lo | Name=10 Txn Elongation | Name=5 Strong Enhancer | Name=7 Weak Enhancer   | Name=11 Weak Txn       | Name=12 Repressed      | Name=11 Weak Txn       | 61642295  |
| rs191972868 | 16         | 11         | 61401336  | Name=13 Heterochrom/lo | Name=11 Weak Txn       | Name=13 Heterochrom/lo | Name=11 Weak Txn       | Name=9 Txn Transition  | Name=11 Weak Txn       | Name=11 Weak Txn       | Name=13 Heterochrom/lo | Name=10 Txn Elongation | 61644760  |
| rs7942717   | 16         | 11         | 61403864  | Name=6 Weak Enhancer   | Name=7 Weak Enhancer   | Name=13 Heterochrom/lo | Name=11 Weak Txn       | Name=4 Strong Enhancer | Name=10 Txn Elongation | Name=10 Txn Elongation | Name=12 Repressed      | Name=10 Txn Elongation | 61647288  |
| rs115905177 | 16         | 11         | 61403958  | Name=6 Weak Enhancer   | Name=7 Weak Enhancer   | Name=13 Heterochrom/lo | Name=11 Weak Txn       | Name=4 Strong Enhancer | Name=10 Txn Elongation | Name=10 Txn Elongation | Name=12 Repressed      | Name=10 Txn Elongation | 61647382  |
| rs174634    | 16         | 11         | 61403963  | Name=6 Weak Enhancer   | Name=7 Weak Enhancer   | Name=13 Heterochrom/lo | Name=11 Weak Txn       | Name=4 Strong Enhancer | Name=10 Txn Elongation | Name=10 Txn Elongation | Name=12 Repressed      | Name=10 Txn Elongation | 61647387  |
| rs174635    | 16         | 11         | 61404003  | Name=2 Weak Promoter   | Name=7 Weak Enhancer   | Name=13 Heterochrom/lo | Name=11 Weak Txn       | Name=4 Strong Enhancer | Name=10 Txn Elongation | Name=10 Txn Elongation | Name=12 Repressed      | Name=10 Txn Elongation | 61647427  |
| rs116672159 | 16         | 11         | 61404689  | Name=6 Weak Enhancer   | Name=7 Weak Enhancer   | Name=13 Heterochrom/lo | Name=11 Weak Txn       | Name=4 Strong Enhancer | Name=9 Txn Transition  | Name=11 Weak Txn       | Name=13 Heterochrom/lo | Name=11 Weak Txn       | 61648113  |
| rs7930349   | 16         | 11         | 61405787  | Name=7 Weak Enhancer   | Name=6 Weak Enhancer   | Name=13 Heterochrom/lo | Name=11 Weak Txn       | Name=5 Strong Enhancer | Name=5 Strong Enhancer | Name=5 Strong Enhancer | Name=13 Heterochrom/lo | Name=11 Weak Txn       | 61649211  |
| rs174454    | 16         | 11         | 61407323  | Name=13 Heterochrom/lo | Name=11 Weak Txn       | Name=13 Heterochrom/lo | Name=7 Weak Enhancer   | Name=9 Txn Transition  | Name=11 Weak Txn       | Name=11 Weak Txn       | Name=9 Txn Transition  | Name=11 Weak Txn       | 61650747  |
| rs74626285  | 16         | 11         | 61407747  | Name=13 Heterochrom/lo | Name=11 Weak Txn       | Name=13 Heterochrom/lo | Name=7 Weak Enhancer   | Name=9 Txn Transition  | Name=11 Weak Txn       | Name=9 Txn Transition  | Name=13 Heterochrom/lo | Name=9 Txn Transition  | 61651171  |
| rs116139751 | 16         | 11         | 61409740  | Name=13 Heterochrom/lo | Name=7 Weak Enhancer   | Name=13 Heterochrom/lo | Name=11 Weak Txn       | Name=4 Strong Enhancer | Name=11 Weak Txn       | Name=9 Txn Transition  | Name=13 Heterochrom/lo | Name=10 Txn Elongation | 61653164  |
| rs2524287   | 21         | 11         | 61441126  | Name=12 Repressed      | Name=3 Poised Promoter | Name=2 Weak Promoter   | Name=6 Weak Enhancer   | Name=2 Weak Promoter   | Name=12 Repressed      | Name=2 Weak Promoter   | Name=12 Repressed      | Name=2 Weak Promoter   | 61684550  |
| rs77229376  | 21         | 11         | 61442367  | Name=12 Repressed      | Name=3 Poised Promoter | Name=12 Repressed      | Name=12 Repressed      | Name=12 Repressed      | Name=12 Repressed      | Name=3 Strong Enhancer | Name=3 Poised Promoter | Name=3 Poised Promoter | 61685791  |
| rs78156005  | 21         | 11         | 61442526  | Name=12 Repressed      | Name=3 Poised Promoter | 61685950  |
| rs2521561   | 21         | 11         | 61442565  | Name=12 Repressed      | Name=4 Strong Enhancer | Name=12 Repressed      | Name=3 Poised Promoter | 61685989  |
| rs74957100  | 21         | 11         | 61442650  | Name=12 Repressed      | Name=4 Strong Enhancer | Name=12 Repressed      | Name=3 Poised Promoter | 61686074  |
| rs2524288   | 21         | 11         | 61442912  | Name=12 Repressed      | Name=4 Strong Enhancer | Name=12 Repressed      | Name=12 Repressed      | 61686336  |
| rs76133863  | 21         | 11         | 61443706  | Name=12 Repressed      | Name=12 Repressed      | Name=12 Repressed      | Name=12 Repressed      | Name=13 Heterochrom/lo | Name=12 Repressed      | Name=4 Strong Enhancer | Name=12 Repressed      | Name=3 Poised Promoter | 61687130  |
| rs11230827  | 21         | 11         | 61444030  | Name=13 Heterochrom/lo | Name=13 Heterochrom/lo | Name=12 Repressed      | Name=13 Heterochrom/lo | Name=12 Repressed      | Name=12 Repressed      | Name=4 Strong Enhancer | Name=12 Repressed      | Name=12 Repressed      | 61687454  |

|             |    |    |          |                           |                           |                           |                           |                           |                      |                           |                   |                           |          |
|-------------|----|----|----------|---------------------------|---------------------------|---------------------------|---------------------------|---------------------------|----------------------|---------------------------|-------------------|---------------------------|----------|
| rs187943834 | 21 | 11 | 61444502 | Name=13<br>Heterochrom/lo | Name=13<br>Heterochrom/lo | Name=3 Poised<br>Promoter | Name=13<br>Heterochrom/lo | Name=13<br>Heterochrom/lo | Name=12<br>Repressed | Name=4 Strong<br>Enhancer | Name=12 Repressed | Name=12 Repressed         | 61687926 |
| rs117518711 | 21 | 11 | 61444591 | Name=13<br>Heterochrom/lo | Name=13<br>Heterochrom/lo | Name=3 Poised<br>Promoter | Name=13<br>Heterochrom/lo | Name=13<br>Heterochrom/lo | Name=12<br>Repressed | Name=4 Strong<br>Enhancer | Name=12 Repressed | Name=12 Repressed         | 61688015 |
| rs73491252  | 21 | 11 | 61445281 | Name=13<br>Heterochrom/lo | Name=13<br>Heterochrom/lo | Name=12 Repressed         | Name=13<br>Heterochrom/lo | Name=13<br>Heterochrom/lo | Name=12<br>Repressed | Name=5 Strong<br>Enhancer | Name=12 Repressed | Name=13<br>Heterochrom/lo | 61688705 |
| rs78243280  | 21 | 11 | 61445498 | Name=13<br>Heterochrom/lo | Name=13<br>Heterochrom/lo | Name=12 Repressed         | Name=13<br>Heterochrom/lo | Name=13<br>Heterochrom/lo | Name=12<br>Repressed | Name=5 Strong<br>Enhancer | Name=12 Repressed | Name=13<br>Heterochrom/lo | 61688922 |
| rs116985542 | 21 | 11 | 61445851 | Name=13<br>Heterochrom/lo | Name=13<br>Heterochrom/lo | Name=12 Repressed         | Name=13<br>Heterochrom/lo | Name=13<br>Heterochrom/lo | Name=12<br>Repressed | Name=7 Weak<br>Enhancer   | Name=12 Repressed | Name=13<br>Heterochrom/lo | 61689275 |
| rs190738753 | 21 | 11 | 61446655 | Name=13<br>Heterochrom/lo | Name=13<br>Heterochrom/lo | Name=7 Weak<br>Enhancer   | Name=13<br>Heterochrom/lo | Name=13<br>Heterochrom/lo | Name=12<br>Repressed | Name=4 Strong<br>Enhancer | Name=12 Repressed | Name=7 Weak<br>Enhancer   | 61690079 |
| rs2727258   | 21 | 11 | 61446759 | Name=13<br>Heterochrom/lo | Name=13<br>Heterochrom/lo | Name=7 Weak<br>Enhancer   | Name=13<br>Heterochrom/lo | Name=13<br>Heterochrom/lo | Name=12<br>Repressed | Name=4 Strong<br>Enhancer | Name=12 Repressed | Name=7 Weak<br>Enhancer   | 61690183 |
| rs12420625  | 21 | 11 | 61446981 | Name=13<br>Heterochrom/lo | Name=7 Weak<br>Enhancer   | Name=6 Weak<br>Enhancer   | Name=13<br>Heterochrom/lo | Name=13<br>Heterochrom/lo | Name=12<br>Repressed | Name=4 Strong<br>Enhancer | Name=12 Repressed | Name=5 Strong<br>Enhancer | 61690405 |
| rs77071864  | 21 | 11 | 61446996 | Name=13<br>Heterochrom/lo | Name=7 Weak<br>Enhancer   | Name=6 Weak<br>Enhancer   | Name=13<br>Heterochrom/lo | Name=13<br>Heterochrom/lo | Name=12<br>Repressed | Name=4 Strong<br>Enhancer | Name=12 Repressed | Name=5 Strong<br>Enhancer | 61690420 |
| rs741888    | 21 | 11 | 61447120 | Name=13<br>Heterochrom/lo | Name=5 Strong<br>Enhancer | Name=2 Weak<br>Promoter   | Name=13<br>Heterochrom/lo | Name=13<br>Heterochrom/lo | Name=12<br>Repressed | Name=4 Strong<br>Enhancer | Name=12 Repressed | Name=5 Strong<br>Enhancer | 61690544 |
| rs741887    | 21 | 11 | 61447283 | Name=13<br>Heterochrom/lo | Name=5 Strong<br>Enhancer | Name=4 Strong<br>Enhancer | Name=13<br>Heterochrom/lo | Name=13<br>Heterochrom/lo | Name=12<br>Repressed | Name=4 Strong<br>Enhancer | Name=12 Repressed | Name=5 Strong<br>Enhancer | 61690707 |

\*137 release

†Six candidate SNPs from Fumagalli *et al.*, *Science*, 2015

‡Genomic build36

§Genomic build37

Abbreviations for cell types: GM12878 - B-lymphocyte, lymphoblastoid; H1-hESC - embryonic stem cells; HepG2 - hepatocellular carcinoma; Heterochrom/lo - Heterochromatin, low signal; HMEC - mammary epithelial cells; HSMM - skeletal muscle myoblasts; HUVEC - umbilical vein endothelial cells; K562 - leukemia; NHEK - epidermal keratinocytes; NHLF - lung fibroblasts; Txn - transcription.
