# Supplementary material
Source: PubMed Central journal article supplement (PMC6124650)
Supplement: NIHMS77016-supplement-S5_Table.pdf [file NIHMS77016-supplement-S5_Table.pdf]

**S5 Table. Functional annotation of 43 FADS variants using 3DSNP.**

| <i>rsID*</i> | <i>Position</i> | <i>Score (original list)</i> | <i>3D interacting genes</i> | <i>Closest gene</i>   | <i>Enhancer</i> | <i>Promoter</i> | <i>TFBS</i> | <i>Motif</i> | <i>Leading SNP</i> | <i>Score</i> | <i>LD<sub>r</sub><sup>‡</sup></i> | <i>3D interacting genes</i> | <i>Closest gene</i>          |
|--------------|-----------------|------------------------------|-----------------------------|-----------------------|-----------------|-----------------|-------------|--------------|--------------------|--------------|-----------------------------------|-----------------------------|------------------------------|
| rs174599     | chr11:61621555  | 12.13                        | <i>TMEM258</i> and other 10 | <i>FADS2</i>          | 19              |                 |             |              | rs5792235          | 218.8        | 0.83                              | <i>TMEM258</i> and other 10 | <i>FADS2</i>                 |
| rs174601     | chr11:61623139  | 11.69                        | <i>TMEM258</i> and other 10 | <i>FADS2</i>          | 19              |                 | 1           |              | rs5792235          | 218.8        | 0.82                              | <i>TMEM258</i> and other 10 | <i>FADS2</i>                 |
| rs556656     | chr11:61622904  | 11.9                         | <i>TMEM258</i> and other 10 | <i>FADS2</i>          | 19              |                 | 1           |              | rs6591659          | 211.0        | 1                                 | <i>TMEM258</i> and other 10 | <i>FADS2, FADS1, MIR1908</i> |
| rs191972868  | chr11:61644759  | 8.1                          | <i>TMEM258</i> and other 10 | <i>FADS3</i>          | 4               |                 | 1           | 2            | rs369849285        | 186.4        | 0.86                              | <i>TMEM258</i> and other 10 | <i>FADS3</i>                 |
| rs115905177  | chr11:61647381  | 12.88                        | <i>TMEM258</i> and other 10 | <i>FADS3, MIR6746</i> | 21              |                 |             |              | rs145747072        | 184.9        | 1                                 | <i>TMEM258</i> and other 10 | <i>FADS3</i>                 |
| rs174635     | chr11:61647426  | 16.57                        | <i>TMEM258</i> and other 10 | <i>FADS3, MIR6746</i> | 26              | 2               |             |              | rs174466           | 138.9        | 0.94                              | <i>TMEM258</i> and other 10 | <i>FADS3</i>                 |
| rs174634     | chr11:61647386  | 13.96                        | <i>TMEM258</i> and other 10 | <i>FADS3, MIR6746</i> | 21              |                 |             | 1            | rs174466           | 138.9        | 0.95                              | <i>TMEM258</i> and other 10 | <i>FADS3</i>                 |
| rs174454     | chr11:61650746  | 8.83                         | <i>TMEM258</i> and other 10 | <i>FADS3</i>          | 13              |                 | 1           |              | rs174466           | 138.9        | 0.9                               | <i>TMEM258</i> and other 10 | <i>FADS3</i>                 |
| rs741887     | chr11:61690706  | 68.67                        | <i>RAB31L1</i> and other 10 | <i>RAB31L1</i>        | 71              | 6               | 12          |              | rs739789           | 135.1        | 0.93                              | <i>RAB31L1</i> and other 10 | <i>RAB31L1</i>               |
| rs2521561    | chr11:61685988  | 40.49                        | <i>RAB31L1</i> and other 10 | <i>RAB31L1</i>        | 51              | 4               | 3           |              | rs739789           | 135.1        | 0.95                              | <i>RAB31L1</i> and other 10 | <i>RAB31L1</i>               |
| rs2727258    | chr11:61690182  | 37.89                        | <i>RAB31L1</i> and other 10 | <i>RAB31L1</i>        | 22              | 3               | 14          | 10           | rs739789           | 135.1        | 0.8                               | <i>RAB31L1</i> and other 10 | <i>RAB31L1</i>               |
| rs2524288    | chr11:61686335  | 20.3                         | <i>RAB31L1</i> and other 10 | <i>RAB31L1</i>        | 31              | 2               | 1           |              | rs739789           | 135.1        | 0.95                              | <i>RAB31L1</i> and other 10 | <i>RAB31L1</i>               |
| rs117518711  | chr11:61688014  | 24.99                        | <i>RAB31L1</i> and other 10 | <i>RAB31L1</i>        | 11              | 1               | 20          |              | rs375339708        | 130.0        | 1                                 | <i>RAB31L1</i> and other 10 | <i>RAB31L1</i>               |

|             |                |       |                             |                       |    |    |    |    |             |       |      |                             |                |
|-------------|----------------|-------|-----------------------------|-----------------------|----|----|----|----|-------------|-------|------|-----------------------------|----------------|
| rs74957100  | chr11:61686073 | 24.52 | <i>RAB3IL1</i> and other 10 | <i>RAB3IL1</i>        | 36 | 2  |    |    | rs375339708 | 130.0 | 1    | <i>RAB3IL1</i> and other 10 | <i>RAB3IL1</i> |
| rs12292968  | chr11:61642294 | 26.68 | <i>TMEM258</i> and other 10 | <i>FADS3</i>          | 23 |    | 2  | 9  | rs73491300  | 114.0 | 1    | <i>RAB3IL1</i> and other 10 | <i>BEST1</i>   |
| rs174570†   | chr11:61597211 | 96.67 | <i>TMEM258</i> and other 10 | <i>FADS2</i>          | 34 | 64 |    |    | rs174570    | 96.7  | 1    | <i>TMEM258</i> and other 10 | <i>FADS2</i>   |
| rs77071864  | chr11:61690419 | 59.72 | <i>RAB3IL1</i> and other 10 | <i>RAB3IL1</i>        | 68 | 9  | 2  |    | rs7927548   | 82.0  | 1    | <i>RAB3IL1</i> and other 10 | <i>RAB3IL1</i> |
| rs78243280  | chr11:61688921 | 9.93  | <i>RAB3IL1</i> and other 10 | <i>RAB3IL1</i>        | 16 |    |    |    | rs7927548   | 82.0  | 1    | <i>RAB3IL1</i> and other 10 | <i>RAB3IL1</i> |
| rs741888    | chr11:61690543 | 73.61 | <i>RAB3IL1</i> and other 10 | <i>RAB3IL1</i>        | 68 | 9  | 3  | 10 | rs741888    | 73.6  | 1    | <i>RAB3IL1</i> and other 10 | <i>RAB3IL1</i> |
| rs2524287   | chr11:61684549 | 63.74 | <i>RAB3IL1</i> and other 10 | <i>RAB3IL1</i>        | 21 | 49 | 2  | 2  | rs2524287   | 63.7  | 1    | <i>RAB3IL1</i> and other 10 | <i>RAB3IL1</i> |
| rs12420625  | chr11:61690404 | 62.86 | <i>RAB3IL1</i> and other 10 | <i>RAB3IL1</i>        | 68 | 9  | 4  | 2  | rs12420625  | 62.9  | 1    | <i>RAB3IL1</i> and other 10 | <i>RAB3IL1</i> |
| rs77229376  | chr11:61685790 | 51.42 | <i>RAB3IL1</i> and other 10 | <i>RAB3IL1</i>        | 51 | 19 | 3  |    | rs77229376  | 51.4  | 1    | <i>RAB3IL1</i> and other 10 | <i>RAB3IL1</i> |
| rs7930349   | chr11:61649210 | 23.62 | <i>TMEM258</i> and other 10 | <i>FADS3</i>          | 35 |    | 2  |    | rs77229376  | 51.4  | 0.82 | <i>RAB3IL1</i> and other 10 | <i>RAB3IL1</i> |
| rs187943834 | chr11:61687925 | 48.7  | <i>RAB3IL1</i> and other 10 | <i>RAB3IL1</i>        | 13 | 2  | 35 | 3  | rs187943834 | 48.7  | 1    | <i>RAB3IL1</i> and other 10 | <i>RAB3IL1</i> |
| rs78156005  | chr11:61685949 | 40.07 | <i>RAB3IL1</i> and other 10 | <i>RAB3IL1</i>        | 51 | 4  | 3  |    | rs78156005  | 40.1  | 1    | <i>RAB3IL1</i> and other 10 | <i>RAB3IL1</i> |
| rs116672159 | chr11:61648112 | 23.93 | <i>TMEM258</i> and other 10 | <i>FADS3</i>          | 22 | 2  |    | 8  | rs76656467  | 25.4  | 0.96 | <i>TMEM258</i> and other 10 | <i>FADS3</i>   |
| rs116139751 | chr11:61653163 | 13.88 | <i>TMEM258</i> and other 10 | <i>FADS3</i>          | 23 |    |    |    | rs76656467  | 25.4  | 0.92 | <i>TMEM258</i> and other 10 | <i>FADS3</i>   |
| rs7942717   | chr11:61647287 | 12.98 | <i>TMEM258</i> and other 10 | <i>FADS3, MIR6746</i> | 21 |    |    |    | rs76656467  | 25.4  | 0.83 | <i>TMEM258</i> and other 10 | <i>FADS3</i>   |
| rs190738753 | chr11:61690078 | 20.64 | <i>RAB3IL1</i> and other 10 | <i>RAB3IL1</i>        | 22 | 3  | 10 |    | rs190738753 | 20.6  | 1    | <i>RAB3IL1</i> and other 10 | <i>RAB3IL1</i> |
| rs7115739   | chr11:61641716 | 18.9  | <i>TMEM258</i> and other 10 | <i>FADS3</i>          | 22 |    | 9  |    | rs7115739   | 18.9  | 1    | <i>TMEM258</i> and other 10 | <i>FADS3</i>   |

|             |                |       |                                |                |    |   |   |   |             |      |      |                                |                |
|-------------|----------------|-------|--------------------------------|----------------|----|---|---|---|-------------|------|------|--------------------------------|----------------|
| rs174450    | chr11:61641541 | 14.94 | <u>TMEM258</u><br>and other 10 | <u>FADS3</u>   | 15 |   | 8 | 1 | rs174626    | 18.2 | 0.86 | <u>TMEM258</u><br>and other 10 |                |
| rs11230827  | chr11:61687453 | 17.6  | <u>RAB3IL1</u> and<br>other 10 | <u>RAB3IL1</u> | 21 | 4 | 7 |   | rs11230827  | 17.6 | 1    | <u>RAB3IL1</u> and<br>other 10 | <u>RAB3IL1</u> |
| rs76133863  | chr11:61687129 | 15.85 | <u>RAB3IL1</u> and<br>other 10 | <u>RAB3IL1</u> | 24 | 3 | 1 |   | rs76133863  | 15.9 | 1    | <u>RAB3IL1</u> and<br>other 10 | <u>RAB3IL1</u> |
| rs11501631  | chr11:61622729 | 13.52 | <u>TMEM258</u><br>and other 10 | <u>FADS2</u>   | 19 |   |   | 2 | rs11501631  | 13.5 | 1    | <u>TMEM258</u><br>and other 10 | <u>FADS2</u>   |
| rs74771917  | chr11:61627959 | 13.51 | <u>TMEM258</u><br>and other 10 | <u>FADS2</u>   | 19 | 1 | 4 |   | rs74771917  | 13.5 | 1    | <u>TMEM258</u><br>and other 10 | <u>FADS2</u>   |
| rs3168072   | chr11:61631509 | 6.99  | <u>TMEM258</u><br>and other 10 | <u>FADS2</u>   | 1  |   |   | 1 | rs74771917  | 13.5 | 0.97 | <u>TMEM258</u><br>and other 10 | <u>FADS2</u>   |
| rs182008711 | chr11:61621622 | 11.86 | <u>TMEM258</u><br>and other 10 | <u>FADS2</u>   | 18 |   |   | 1 | rs182008711 | 11.9 | 1    | <u>TMEM258</u><br>and other 10 | <u>FADS2</u>   |
| rs73487492  | chr11:61621610 | 11.76 | <u>TMEM258</u><br>and other 10 | <u>FADS2</u>   | 18 |   |   | 1 | rs73487492  | 11.8 | 1    | <u>TMEM258</u><br>and other 10 | <u>FADS2</u>   |
| rs116985542 | chr11:61689274 | 11.66 | <u>RAB3IL1</u> and<br>other 10 | <u>RAB3IL1</u> | 17 |   |   | 1 | rs116985542 | 11.7 | 1    | <u>RAB3IL1</u> and<br>other 10 | <u>RAB3IL1</u> |
| rs74626285  | chr11:61651170 | 11.06 | <u>TMEM258</u><br>and other 10 | <u>FADS3</u>   | 18 |   |   |   | rs74626285  | 11.1 | 1    | <u>TMEM258</u><br>and other 10 | <u>FADS3</u>   |
| rs174602†   | chr11:61624413 | 7.96  | <u>TMEM258</u><br>and other 10 | <u>FADS2</u>   | 3  |   | 1 | 2 | rs174602    | 8.0  | 1    | <u>TMEM258</u><br>and other 10 | <u>FADS2</u>   |
| rs73491252  | chr11:61688704 | 7.71  | <u>RAB3IL1</u> and<br>other 10 | <u>RAB3IL1</u> | 11 |   |   |   | rs73491252  | 7.7  | 1    | <u>RAB3IL1</u> and<br>other 10 | <u>RAB3IL1</u> |
| rs12577276  | chr11:61632309 | 6.86  | <u>TMEM258</u><br>and other 10 | <u>FADS2</u>   |    |   |   | 1 | rs12577276  | 6.9  | 1    | <u>TMEM258</u><br>and other 10 | <u>FADS2</u>   |

The underlined SNPs in red font are proxies ( $r^2 > 0.8$ ) for the original 43 SNPs. They have been identified by 3DSNP as having higher functionality score than the original SNP.

\*137 release

†SNPs with the highest level of evidence (strongest interaction signals) from the six candidate SNPs from Fumagalli *et al.*, *Science*, 2015

‡ $r^2$  with original SNP

3D - 3 dimensional; LD - linkage disequilibrium; TFBS - transcription factor binding site.
