# Supplementary material
Source: PubMed Central journal article supplement (PMC6124650)
Supplement: NIHMS77016-supplement-S6_Table.pdf [file NIHMS77016-supplement-S6_Table.pdf]

|             |                                   |   |   |   |   |
|-------------|-----------------------------------|---|---|---|---|
| rs11230827  |                                   | 0 |   |   |   |
| rs76133863  |                                   | 0 |   |   |   |
| rs11501631  |                                   | 0 |   |   |   |
| rs74771917  | <u>INCENP</u>                     | 1 |   | + |   |
| rs3168072   | <u>INCENP</u>                     | 1 |   | + |   |
| rs182008711 |                                   | 0 |   |   |   |
| rs73487492  |                                   | 0 |   |   | + |
| rs116985542 |                                   | 0 |   |   |   |
| rs74626285  |                                   | 0 |   |   |   |
| rs174602    | <u>FADS2</u>                      | 1 | + |   | + |
| rs174602    | <u>FADS1</u>                      | 1 | + |   | + |
| rs174602    | <u>TMEM258/C11o</u><br><u>r10</u> | 1 | + |   | + |
| rs73491252  |                                   | 0 |   |   |   |
| rs12577276  |                                   | 0 |   |   |   |

\*Correlated gene column represents loci the variant in the rsID column is an eQTL for. The underlined loci in red font represent trans eQTLs (the variant does not locate in the locus). †Tissues column indicates the number of tissues in which this variant is an eQTL. ‡Serum lipids QTL column "+" sign indicates that this variant is a known QTL for serum lipids. eQTL - expression quantitative trait locus; QTL - quantitative trait locus.
