# Supplementary material
Source: PubMed Central journal article supplement (PMC6124650)
Supplement: NIHMS77016-supplement-S7_Table.pdf [file NIHMS77016-supplement-S7_Table.pdf]

**S7 Table. The intronic rs5792235 variant's 3D interacting variants and their associated phenotypes**

| Variant     | chr | BP*      | Reference Allele | Alternative Allele | NHGRI/EBI GWAS hits                                                                                                                                                                                                                                                                                                                                 | GENCODE genes  | dbSNP functional annotation |
|-------------|-----|----------|------------------|--------------------|-----------------------------------------------------------------------------------------------------------------------------------------------------------------------------------------------------------------------------------------------------------------------------------------------------------------------------------------------------|----------------|-----------------------------|
| rs102274    | 11  | 61790354 | T                | C                  | -                                                                                                                                                                                                                                                                                                                                                   | <i>TMEM258</i> | intronic                    |
|             |     |          | T                | C                  | Metabolic syndrome; P=6E-7; PMID: 20694148<br>Crohn's disease; P=2E-11; PMID: 21102463<br>Phospholipid levels (plasma); P=7E-64; PMID: 21829377<br>Phospholipid levels (plasma); P=8E-153; PMID: 21829377<br>Phospholipid levels (plasma); P=1E-203; PMID: 22359512<br>Metabolite levels; P=4E-264; PMID: 22916037                                  | <i>TMEM258</i> | intronic                    |
| rs102275    | 11  | 61790331 |                  |                    | Oleic acid (18:1n-9) plasma levels; P=2E-32; PMID: 23362303<br>Palmitoleic acid (16:1n-7) plasma levels; P=7E-13; PMID: 23362303<br>Stearic acid (18:0) plasma levels; P=1E-20; PMID: 23362303<br>Plasma omega-6 polyunsaturated fatty acid levels (arachidonic acid); P=7E-147; PMID: 24823311<br>Trans fatty acid levels; P=2E-13; PMID: 25646338 |                |                             |
| rs108499    | 11  | 61779765 | C                | T                  | Trans fatty acid levels; P=5E-11; PMID: 25646338                                                                                                                                                                                                                                                                                                    | <i>MYRF</i>    | intronic                    |
| rs11320420  | 11  | 61774534 | GA               | G                  | -                                                                                                                                                                                                                                                                                                                                                   | <i>MYRF</i>    | intronic                    |
| rs143352979 | 11  | 61853156 | 7-mer            | A                  | -                                                                                                                                                                                                                                                                                                                                                   | <i>FADS2</i>   | intronic                    |
|             |     |          | A                | G                  | Response to statin therapy; P=7E-6; PMID: 20339536<br>Metabolic syndrome; P=4E-7; PMID: 20694148<br>Phospholipid levels (plasma); P=3E-152; PMID: 21829377<br>Phospholipid levels (plasma); P=3E-63; PMID: 21829377<br>Trans fatty acid levels; P=5E-14; PMID: 25646338                                                                             | <i>FADS2</i>   | intronic                    |
| rs1535      | 11  | 61830500 |                  |                    | Trans fatty acid levels; P=5E-12; PMID: 25646338                                                                                                                                                                                                                                                                                                    |                |                             |
| rs174528    | 11  | 61776027 | T                | C                  | Trans fatty acid levels; P=4E-12; PMID: 25646338                                                                                                                                                                                                                                                                                                    | <i>MYRF</i>    | intronic                    |
| rs174529    | 11  | 61776489 | T                | C                  | -                                                                                                                                                                                                                                                                                                                                                   | <i>MYRF</i>    | intronic                    |
| rs174530    | 11  | 61779120 | A                | G                  | -                                                                                                                                                                                                                                                                                                                                                   | <i>MYRF</i>    | intronic                    |
| rs174533    | 11  | 61781553 | G                | A                  | -                                                                                                                                                                                                                                                                                                                                                   | <i>MYRF</i>    | intronic                    |
| rs174534    | 11  | 61781986 | A                | G                  | Trans fatty acid levels; P=4E-11; PMID: 25646338                                                                                                                                                                                                                                                                                                    | <i>MYRF</i>    | intronic                    |
|             |     |          | T                | C                  | Phospholipid levels (plasma); P=1E-151; PMID: 21829377<br>Phospholipid levels (plasma); P=6E-58; PMID: 21829377<br>Blood metabolite levels; P=2E-94; PMID: 24816252<br>Blood metabolite levels; P=3E-36; PMID: 24816252<br>Red blood cell fatty acid levels; P=2E-12; PMID: 25500335<br>Trans fatty acid levels; P=1E-13; PMID: 25646338            | <i>MYRF</i>    | synonymous                  |
| rs174535    | 11  | 61783884 |                  |                    |                                                                                                                                                                                                                                                                                                                                                     |                |                             |
| rs174536    | 11  | 61784455 | A                | C                  | Phospholipid levels (plasma); P=1E-63; PMID: 21829377<br>Trans fatty acid levels; P=1E-13; PMID: 25646338                                                                                                                                                                                                                                           | <i>MYRF</i>    | intronic                    |

|          |    |          |   |   |                                                                                                                                                                                                                                                                                                                                                                                                                                                                                                                                                                                                                                                                                                                                                                                    |                |          |
|----------|----|----------|---|---|------------------------------------------------------------------------------------------------------------------------------------------------------------------------------------------------------------------------------------------------------------------------------------------------------------------------------------------------------------------------------------------------------------------------------------------------------------------------------------------------------------------------------------------------------------------------------------------------------------------------------------------------------------------------------------------------------------------------------------------------------------------------------------|----------------|----------|
| rs174537 | 11 | 61785208 | G | T | Colorectal cancer; P=9E-21; PMID: 24836286<br>Trans fatty acid levels; P=8E-14; PMID: 25646338                                                                                                                                                                                                                                                                                                                                                                                                                                                                                                                                                                                                                                                                                     | <i>MYRF</i>    | intronic |
| rs174538 | 11 | 61792609 | G | A | Phospholipid levels (plasma); P=5E-58; PMID: 21829377<br>Blood metabolite levels; P=9E-14; PMID: 24816252<br>Trans fatty acid levels; P=1E-12; PMID: 25646338                                                                                                                                                                                                                                                                                                                                                                                                                                                                                                                                                                                                                      | <i>TMEM258</i> | 5'-UTR   |
| rs174541 | 11 | 61798436 | T | C | Metabolite levels; P=3E-9; PMID: 23378610<br>Red blood cell fatty acid levels; P=3E-19; PMID: 25500335<br>Trans fatty acid levels; P=4E-13; PMID: 25646338                                                                                                                                                                                                                                                                                                                                                                                                                                                                                                                                                                                                                         | <i>FADS2</i>   |          |
| rs174544 | 11 | 61800281 | C | A | -                                                                                                                                                                                                                                                                                                                                                                                                                                                                                                                                                                                                                                                                                                                                                                                  | <i>FADS1</i>   | 3'-UTR   |
| rs174545 | 11 | 61801834 | C | G | Red blood cell fatty acid levels; P=8E-90; PMID: 25500335<br>Trans fatty acid levels; P=7E-14; PMID: 25646338                                                                                                                                                                                                                                                                                                                                                                                                                                                                                                                                                                                                                                                                      | <i>FADS1</i>   | 3'-UTR   |
| rs174546 | 11 | 61802358 | C | T | LDL cholesterol; P=1E-7; PMID: 19060910<br>Cholesterol total; P=2E-22; PMID: 20686565<br>HDL cholesterol; P=2E-22; PMID: 20686565<br>LDL cholesterol; P=1E-21; PMID: 20686565<br>Triglycerides; P=5E-24; PMID: 20686565<br>Metabolic syndrome; P=6E-7; PMID: 20694148<br>Cholesterol total; P=3E-37; PMID: 24097068<br>HDL cholesterol; P=8E-28; PMID: 24097068<br>LDL cholesterol; P=2E-39; PMID: 24097068<br>Triglycerides; P=7E-38; PMID: 24097068<br>Trans fatty acid levels; P=6E-14; PMID: 25646338                                                                                                                                                                                                                                                                          | <i>FADS1</i>   | 3'-UTR   |
| rs174547 | 11 | 61803311 | T | C | HDL cholesterol; P=2E-12; PMID: 19060906<br>Triglycerides; P=2E-14; PMID: 19060906<br>Metabolite levels; P=7E-179; PMID: 20037589<br>Resting heart rate; P=2E-9; PMID: 20639392<br>Phospholipid levels (plasma); P=3E-64; PMID: 21829377<br>Phospholipid levels (plasma); P=4E-154; PMID: 21829377<br>Metabolic traits; P=9E-116; PMID: 21886157<br>Lipid metabolism phenotypes; P=8E-262; PMID: 22286219<br>Comprehensive strength and appendicular lean mass; P=2E-7; PMID: 22960237<br>Plasma omega-6 polyunsaturated fatty acid levels (arachidonic acid); P=3E-971; PMID: 24823311<br>Plasma omega-6 polyunsaturated fatty acid levels (gamma-linolenic acid); P=2E-72; PMID: 24823311<br>Height; P=6E-18; PMID: 25429064<br>Trans fatty acid levels; P=6E-14; PMID: 25646338 | <i>FADS1</i>   | intronic |

|          |    |          |   |     |                                                                                                                                                                                                                                                                                                                                                                                                                                                                                                                                                                                                                                                                                |                      |          |
|----------|----|----------|---|-----|--------------------------------------------------------------------------------------------------------------------------------------------------------------------------------------------------------------------------------------------------------------------------------------------------------------------------------------------------------------------------------------------------------------------------------------------------------------------------------------------------------------------------------------------------------------------------------------------------------------------------------------------------------------------------------|----------------------|----------|
| rs174548 | 11 | 61803876 | C | G   | Metabolite levels; P=5E-8; PMID: 19043545<br>HDL cholesterol; P=1E-12; PMID: 20864672<br>Triglycerides; P=5E-14; PMID: 20864672<br>Hematology traits; P=4E-8; PMID: 23303382<br>Blood metabolite levels; P=1E-84; PMID: 24816252<br>Blood metabolite ratios; P=2E-361; PMID: 24816252<br>Trans fatty acid levels; P=5E-15; PMID: 25646338                                                                                                                                                                                                                                                                                                                                      | <i>FADS1</i>         | intronic |
| rs174549 | 11 | 61803910 | G | A   | Comprehensive strength and appendicular lean mass; P=8E-7; PMID: 22960237<br>Metabolite levels; P=2E-30; PMID: 23281178<br>Heart rate; P=1E-22; PMID: 23583979<br>Laryngeal squamous cell carcinoma; P=1E-20; PMID: 25194280<br>Red blood cell fatty acid levels; P=2E-10; PMID: 25500335<br>Red blood cell fatty acid levels; P=4E-10; PMID: 25500335<br>Trans fatty acid levels; P=5E-15; PMID: 25646338                                                                                                                                                                                                                                                                     | <i>FADS1</i>         | intronic |
| rs174550 | 11 | 61804006 | T | C   | Fasting glucose-related traits; P=2E-15; PMID: 20081858<br>Fasting glucose-related traits; P=5E-13; PMID: 20081858<br>Phospholipid levels (plasma); P=1E-57; PMID: 21829377<br>Fasting glucose-related traits (interaction with BMI); P=2E-9; PMID: 22581228<br>Blood metabolite levels; P=7E-24; PMID: 24816252<br>Plasma omega-6 polyunsaturated fatty acid levels (adrenic acid); P=4E-140; PMID: 24823311<br>Plasma omega-6 polyunsaturated fatty acid levels (linoleic acid); P=4E-274; PMID: 24823311<br>Fasting plasma glucose; P=3E-6; PMID: 25187374<br>Red blood cell fatty acid levels; P=6E-43; PMID: 25500335<br>Trans fatty acid levels; P=6E-14; PMID: 25646338 | <i>FADS1</i>         | intronic |
| rs174551 | 11 | 61806212 | T | C   | -                                                                                                                                                                                                                                                                                                                                                                                                                                                                                                                                                                                                                                                                              | <i>FADS1</i>         | intronic |
| rs174553 | 11 | 61807686 | A | G,T | -                                                                                                                                                                                                                                                                                                                                                                                                                                                                                                                                                                                                                                                                              | <i>FADS1</i>         | intronic |
| rs174554 | 11 | 61811991 | A | G   | -                                                                                                                                                                                                                                                                                                                                                                                                                                                                                                                                                                                                                                                                              | <i>FADS1</i>         | intronic |
| rs174555 | 11 | 61812288 | T | C   | Plasma omega-6 polyunsaturated fatty acid levels (dihomo-gamma-linolenic acid); P=5E-168; PMID: 24823311<br>Trans fatty acid levels; P=6E-15; PMID: 25646338                                                                                                                                                                                                                                                                                                                                                                                                                                                                                                                   | <i>FADS1</i>         | intronic |
| rs174556 | 11 | 61813163 | C | T   | Blood metabolite levels; P=2E-22; PMID: 24816252<br>Trans fatty acid levels; P=3E-14; PMID: 25646338                                                                                                                                                                                                                                                                                                                                                                                                                                                                                                                                                                           | <i>FADS1</i>         | intronic |
| rs174557 | 11 | 61813896 | A | G   | -                                                                                                                                                                                                                                                                                                                                                                                                                                                                                                                                                                                                                                                                              | <i>RP11-467L20.7</i> | intronic |
| rs174559 | 11 | 61814184 | G | A   | -                                                                                                                                                                                                                                                                                                                                                                                                                                                                                                                                                                                                                                                                              | <i>RP11-467L20.7</i> | intronic |

|          |    |          |   |   |                                                                                                                                                                                                                                            |                      |          |
|----------|----|----------|---|---|--------------------------------------------------------------------------------------------------------------------------------------------------------------------------------------------------------------------------------------------|----------------------|----------|
| rs174560 | 11 | 61814292 | T | C | -                                                                                                                                                                                                                                          | <i>RP11-467L20.7</i> | intronic |
| rs174561 | 11 | 61815236 | T | C | -                                                                                                                                                                                                                                          | <i>MIR1908</i>       | intronic |
| rs174562 | 11 | 61817672 | A | G | -                                                                                                                                                                                                                                          | <i>FADS1</i>         | -        |
| rs174564 | 11 | 61820833 | A | G | -                                                                                                                                                                                                                                          | <i>FADS1</i>         | -        |
| rs174565 | 11 | 61824164 | C | G | -                                                                                                                                                                                                                                          | <i>FADS1</i>         | -        |
| rs174566 | 11 | 61824890 | A | G | -                                                                                                                                                                                                                                          | <i>FADS1</i>         | -        |
| rs174567 | 11 | 61825533 | A | G | -                                                                                                                                                                                                                                          | <i>FADS1</i>         | -        |
| rs174568 | 11 | 61826344 | C | T | -                                                                                                                                                                                                                                          | <i>FADS1</i>         | -        |
|          |    |          | C | T | Cholesterol total; P=2E-10; PMID: 19060911<br>HDL cholesterol; P=4E-6; PMID: 19060911<br>LDL cholesterol; P=4E-13; PMID: 19060911<br>Glycated hemoglobin levels; P=2E-7; PMID: 24647736<br>Trans fatty acid levels; P=1E-7; PMID: 25646338 | <i>FADS2</i>         | intronic |
| rs174570 | 11 | 61829740 |   |   |                                                                                                                                                                                                                                            |                      |          |
| rs174574 | 11 | 61832870 | A | C | Phospholipid levels (plasma); P=4E-55; PMID: 21829377<br>Trans fatty acid levels; P=3E-14; PMID: 25646338                                                                                                                                  | <i>FADS2</i>         | intronic |
| rs174576 | 11 | 61836038 | C | A | Trans fatty acid levels; P=3E-14; PMID: 25646338                                                                                                                                                                                           | <i>FADS2</i>         | intronic |
|          |    |          | C | A | P wave duration; P=3E-8; PMID: 24850809                                                                                                                                                                                                    | <i>FADS2</i>         | intronic |
| rs174577 | 11 | 61837342 |   |   | Iron status biomarkers (transferrin levels); P=2E-17; PMID: 25352340<br>Trans fatty acid levels; P=4E-14; PMID: 25646338                                                                                                                   |                      |          |
|          |    |          | T | A | Blood metabolite levels; P=3E-24; PMID: 24816252<br>Blood metabolite levels; P=6E-42; PMID: 24816252<br>Trans fatty acid levels; P=5E-14; PMID: 25646338                                                                                   | <i>FADS2</i>         | intronic |
| rs174578 | 11 | 61838027 |   |   |                                                                                                                                                                                                                                            |                      |          |
| rs174580 | 11 | 61839170 | A | G | -                                                                                                                                                                                                                                          | <i>FADS2</i>         | intronic |
| rs174581 | 11 | 61839211 | G | A | -                                                                                                                                                                                                                                          | <i>FADS2</i>         | intronic |
|          |    |          | C | T | Response to statin therapy; P=3E-6; PMID: 20339536<br>QT interval; P=8E-11; PMID: 24952745<br>Trans fatty acid levels; P=2E-13; PMID: 25646338                                                                                             | <i>FADS2</i>         | intronic |
| rs174583 | 11 | 61842278 |   |   |                                                                                                                                                                                                                                            |                      |          |
| rs174584 | 11 | 61843278 | G | A | -                                                                                                                                                                                                                                          | <i>FADS2</i>         | intronic |
| rs174592 | 11 | 61851136 | A | G | -                                                                                                                                                                                                                                          | <i>FADS2</i>         | intronic |
| rs174594 | 11 | 61852357 | C | A | -                                                                                                                                                                                                                                          | <i>FADS2</i>         | intronic |
| rs174598 | 11 | 61853722 | G | A | -                                                                                                                                                                                                                                          | <i>FADS2</i>         | intronic |
| rs174599 | 11 | 61854084 | G | C | -                                                                                                                                                                                                                                          | <i>FADS2</i>         | intronic |
| rs174600 | 11 | 61854755 | T | C | -                                                                                                                                                                                                                                          | <i>FADS2</i>         | intronic |

|            |    |          |     |    |                                                                                                                                                                                                                      |                      |          |
|------------|----|----------|-----|----|----------------------------------------------------------------------------------------------------------------------------------------------------------------------------------------------------------------------|----------------------|----------|
|            |    |          | C   | T  | Liver enzyme levels (alkaline phosphatase); P=3E-9; PMID: 22001757                                                                                                                                                   | <i>FADS2</i>         | intronic |
| rs174601   | 11 | 61855668 |     |    | Blood metabolite levels; P=8E-16; PMID: 24816252<br>Red blood cell fatty acid levels; P=3E-305; PMID: 25500335<br>Trans fatty acid levels; P=3E-13; PMID: 25646338                                                   |                      |          |
| rs28456    | 11 | 61822009 | A   | G  | -                                                                                                                                                                                                                    | <i>FADS1</i>         | -        |
| rs35473591 | 11 | 61818856 | C   | CT | -                                                                                                                                                                                                                    | <i>FADS1</i>         | -        |
| rs3834458  | 11 | 61827448 | CT  | C  | -                                                                                                                                                                                                                    | <i>FADS1</i>         | -        |
|            |    |          | G   | T  | Phospholipid levels (plasma); P=1E-139; PMID: 21829377<br>Phospholipid levels (plasma); P=6E-55; PMID: 21829377<br>Phospholipid levels (plasma); P=9E-60; PMID: 21829377<br>Platelet counts; P=3E-10; PMID: 22139419 | <i>FEN1</i>          | 3'-UTR   |
| rs4246215  | 11 | 61796827 |     |    | Inflammatory bowel disease; P=2E-15; PMID: 23128233<br>Red blood cell fatty acid levels; P=1E-9; PMID: 25500335<br>Trans fatty acid levels; P=5E-13; PMID: 25646338                                                  |                      |          |
| rs509360   | 11 | 61781087 | A   | G  | Trans fatty acid levels; P=6E-10; PMID: 25646338                                                                                                                                                                     | <i>MYRF</i>          | intronic |
| rs57668028 | 11 | 61824523 | GAA | G  | -                                                                                                                                                                                                                    | <i>FADS1</i>         | -        |
| rs5792239  | 11 | 61846954 | CT  | C  | -                                                                                                                                                                                                                    | <i>FADS2</i>         | intronic |
| rs72643557 | 11 | 61811955 | C   | T  | -                                                                                                                                                                                                                    | <i>FADS1</i>         | intronic |
| rs72643559 | 11 | 61852802 | T   | C  | -                                                                                                                                                                                                                    | <i>FADS2</i>         | intronic |
| rs7394579  | 11 | 61813978 | A   | G  | -                                                                                                                                                                                                                    | <i>RP11-467L20.7</i> | intronic |
| rs97384    | 11 | 61856709 | T   | C  | -                                                                                                                                                                                                                    | <i>FADS2</i>         | intronic |
| rs99780    | 11 | 61829161 | C   | T  | -                                                                                                                                                                                                                    | <i>FADS1</i>         | intronic |

The NHGRI/EBI GWAS hits column lists the GWAS associated traits, P values and PubMed IDs.

\*hg38

BP - basepair; EBI - European Bioinformatics Institute; GWAS - genome-wide association study; NHGRI - National Human Genome Research Institute; PMID - PubMed ID; UTR - untranslated region.
