# Supplementary material
Source: PubMed Central journal article supplement (PMC6124650)

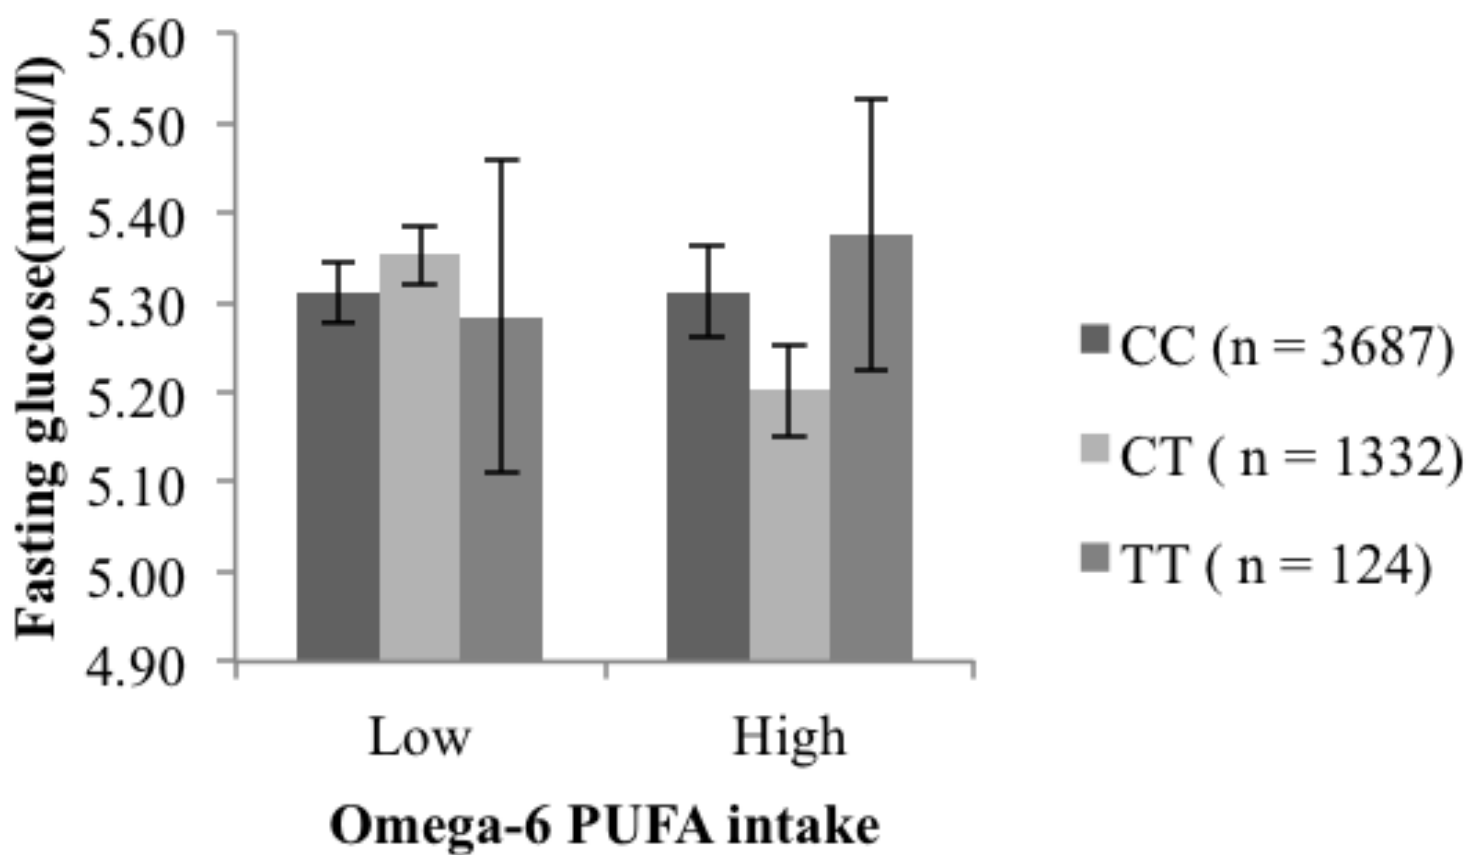

Supplement: NIHMS77016-supplement-S1_Figure.pdf [file NIHMS77016-supplement-S1_Figure.pdf]
